# Supplementary material for: Exploring the drivers of the elevated ozone production in Beijing in summertime during 2005–2016
Source: Copernicus journal article supplement (doi:10.5194/acp-2020-434), 2020-06-24
Supplement: Supplementary file [file acp-2020-434-AC2-supplement.zip]

**Exploring the drivers of the increased ozone production in Beijing in  
summertime during 2005-2016**

Wenjie Wang<sup>1</sup>, David D. Parrish<sup>2</sup>, Xin Li<sup>1,3,4\*</sup>, Min Shao<sup>2,1</sup>, Ying Liu<sup>1</sup>, Sihua Lu<sup>1</sup>, Min  
Hu<sup>1</sup>, Yusheng Wu<sup>1,#</sup>, Limin Zeng<sup>1</sup>, Yuanhang Zhang<sup>1</sup>

<sup>1</sup> State Key Joint Laboratory of Environmental Simulation and Pollution Control,  
College of Environmental Sciences and Engineering, Peking University, Beijing,  
China

<sup>2</sup> Institute for Environmental and Climate Research, Jinan University,  
Guangzhou 511443, China

<sup>3</sup> International Joint Laboratory for Regional Pollution Control, Ministry of  
Education, Beijing, 100816, China

<sup>4</sup> Collaborative Innovation Centre of Atmospheric Environment and Equipment  
Technology, Nanjing University of Information Science & Technology, Nanjing,  
210044, China

<sup>#</sup> now at Department of Physics, University of Helsinki, Helsinki, Finland

\* Corresponding author.

Address: College of Environmental Sciences and Engineering, Peking  
University, Beijing 100871, China

Phone: 86-10-62757973

Email: [li\\_xin@pku.edu.cn](mailto:li_xin@pku.edu.cn)

## Abstract

In the past decade, average  $\text{PM}_{2.5}$  concentrations decreased rapidly under the strong pollution control measures in major cities in China; however, ozone ( $\text{O}_3$ ) pollution emerged as a significant problem. Here we examine a unique (for China) 12-year data set of ground-level  $\text{O}_3$  and precursor concentrations collected at an urban site in Beijing (PKUERS), where the maximum daily 8 h average (MDA8)  $\text{O}_3$  concentration and daytime Ox ( $\text{O}_3 + \text{NO}_2$ ) concentration in August increased by  $2.3 \pm 1.2$  ppbv ( $+3.3 \pm 1.8\%$ )  $\text{yr}^{-1}$  and  $1.4 \pm 0.6$  ( $+1.9 \pm 0.8\%$ )  $\text{yr}^{-1}$  respectively from 2005 to 2016. In contrast, daytime concentrations of nitrogen oxides ( $\text{NO}_x$ ) and the OH reactivity of volatile organic compounds (VOCs) both decreased significantly. Over this same time, the decrease of particulate matter, and thus the aerosol optical depth, led to enhanced solar radiation and photolysis frequencies, with near-surface  $j(\text{NO}_2)$  increasing at a rate of  $3.6 \pm 0.8\%$   $\text{yr}^{-1}$ . We use an observation based box model to analyze the combined effect of solar radiation and ozone precursor changes on ozone production rate,  $P(\text{O}_3)$ . The results indicate that the ratio of the rates of decrease of VOCs and  $\text{NO}_x$  (about 1.1) is inefficient in reducing ozone production in Beijing.  $P(\text{O}_3)$  increased during the decade due to more rapid atmospheric oxidation caused to a large extent by the decrease of particulate matter. This elevated ozone production was driven primarily by increased actinic flux due to  $\text{PM}_{2.5}$  decrease and to a lesser extent by reduced heterogeneous uptake of  $\text{HO}_2$ . Therefore, the influence of  $\text{PM}_{2.5}$  on actinic flux and thus on the rate of oxidation of VOCs and  $\text{NO}_x$  to ozone and to secondary aerosol (i.e., the major contributor to  $\text{PM}_{2.5}$ ) is important for determining the atmospheric effects of controlling the emissions of the common precursors of  $\text{PM}_{2.5}$  and ozone when attempting to control these two important air pollutants.

## 1 Introduction

Tropospheric ozone ( $O_3$ ) plays a key role in the oxidizing capacity of the atmosphere and affects the global climate; high concentrations of ground-level ozone are harmful to human health and ecosystems (Monks et al., 2015; Fiore et al., 2009). Ozone is produced rapidly in sun-lit polluted air by photochemical oxidation of volatile organic compounds (VOCs) in the presence of nitrogen oxides ( $NO_x \equiv NO + NO_2$ ) (Atkinson, 2000). In recent years, China has undergone rapid economic development, resulting in higher demand for energy, and greater usage of fossil fuels. As a result, high emissions to the atmosphere produce heavy pollution in eastern China, which now suffers from severe ozone pollution, especially in urban areas, where the daily maximum 8 h average (MDA8) ozone level often exceeds the standard of 80 ppb (Jinfeng et al., 2014; Wang et al., 2011; Zhang et al., 2014; Lu et al., 2018; Li et al., 2019a). A recent study reported that the national warm-season (April–September) fourth highest MDA8 ozone level (86.0 ppb) and the number of days with MDA8 values of  $> 70$  ppb was much higher than regional averages in Japan, South Korea, Europe, or the United States (Lu et al., 2018). Satellite observations found that regional ozone concentrations in eastern China increased by 7% between 2005 and 2010 (Verstraeten et al., 2015). From 2013 to 2017, the  $O_3$  concentrations in 74 cities as a whole showed an upward trend with Beijing-Tianjin-Hebei region being the most serious (Li et al., 2019a; Lu et al., 2018). Better understanding of the causes of elevated ozone in China is important for developing effective emission control strategies to reduce the ozone pollution problem.

Aerosols impact ozone production primarily in two ways: alteration of photolysis rates by aerosol radiative influence and heterogeneous reactions occurring on the aerosol surface. The reduction of photolysis frequencies by the extinction effect of aerosol and thus its influence on ozone production has been explored in the past (Dickerson et al., 1997; Castro et al., 2001; Real and Sartelet, 2011; Gerasopoulos et al., 2012; Wang et al., 2019). Absorbing aerosols reduce photolysis frequencies

throughout the boundary layer, and as a result decrease near-surface photochemical ozone production (de Miranda et al., 2005; Jacobson, 1998; Wendisch et al., 1996; Raga et al., 2001). Conversely, scattering aerosols in the boundary layer increase photolysis frequencies throughout the troposphere, and thereby increase ozone production aloft (Jacobson, 1998; Tian et al., 2019; Dickerson et al., 1997). The importance of aerosol heterogeneous reactions in ozone photochemistry in China has been previously investigated in model studies (Lou et al., 2014; Li et al., 2018; Xu et al., 2012; Li et al., 2019a). The effects of NO<sub>2</sub>, NO<sub>3</sub>, and N<sub>2</sub>O<sub>5</sub> heterogeneous reactions showed opposite O<sub>3</sub> concentration changes in VOC-limited and NO<sub>x</sub>-limited regions. In a VOC-limited region, NO<sub>2</sub>, NO<sub>3</sub>, and N<sub>2</sub>O<sub>5</sub> heterogeneous reactions lead to ozone concentration increases (Lou et al., 2014; Xu et al., 2012). The heterogeneous reaction of HO<sub>2</sub> decreases ozone production in both VOC-limited and NO<sub>x</sub>-limited regions by decreasing the reaction rate of HO<sub>2</sub> with NO (Lou et al., 2014; Li et al., 2019a).

In the past decade, Eastern China has experienced severe fine particulate matter (PM<sub>2.5</sub>) pollution in winter (Zhang et al., 2016), and this issue has been the main focus of the government's air pollution control strategy. These stringent emission control measures have significantly decreased the concentrations of particulate matter in many Chinese cities. During 2008-2013, ground-level PM<sub>2.5</sub> estimated from satellite-retrieved aerosol optical depth (AOD) in China declined at a rate of 0.46 µg m<sup>-3</sup> year<sup>-1</sup> (Ma et al., 2016b). Another study indicated that the annual average concentration of PM<sub>2.5</sub> in Beijing decreased by 1.5 µg m<sup>-3</sup> year<sup>-1</sup> and 27% in total from 2000 to 2015 under the implementation of 16 phases' air pollution control measures (Lang et al., 2017). Hu et al (2017) reported that PM<sub>2.5</sub> in Beijing declined significantly from 2006 to 2016, and meanwhile solar radiation increased (Hu et al., 2017). However, despite the reduction in emissions of particulate matter (PM) and ozone precursors, ozone concentrations increased, even while PM concentrations decreased.

In Beijing, the second largest city in China, with rapid economic development and urbanization in recent years, ozone pollution is one of the worst among China's cities. Thus, Beijing is a representative city in which to study urban ozone pollution in China.

Despite extensive study of the relationship between ozone and its precursors in Beijing and other mega cities in China (Zhang et al., 2014;Chou et al., 2011;Lu et al., 2019;Liu et al., 2012), there remains a lack of understanding of the cause of the long-term [surface ozone concentration increase](#) that accompanied reductions in precursor emissions. In this study, we utilize measurements from a representative urban site in Beijing to explore how the variations in solar radiation and heterogeneous reactions influence the trend of ozone and the coupling effect of aerosol and ozone precursor changes on ozone production. Our overall goal is to determine the extent to which increasing actinic flux caused by the decline in PM contributed to the observed increase in ozone concentrations. This research provides a clearer understanding of how efforts to reduce PM concentrations affect ozone concentrations, and thus informs air quality improvement efforts in China's urban areas.

## **2 Materials and methods**

### **2.1 Measurements of air pollutants, photolysis frequencies and aerosol surface concentration**

Ambient air pollutants and photolysis frequencies were measured at an urban site in Beijing in August between 2005 and 2016. The site (39.99° N, 116.31°E) was located on the roof of a six story building (~20m above the ground level) on the campus of Peking University (PKUERS) near the 4th Ring Road with high density of traffic, but without obvious industrial or agricultural sources (Wehner et al., 2008). Temporal trends of air pollutants and composition of VOCs are thought to be representative for the whole of Beijing (Wang et al., 2010;Xu et al., 2011;Zhang et al., 2012). Measured parameters include O<sub>3</sub>, NO<sub>x</sub>, CO, SO<sub>2</sub>, C<sub>2</sub> - C<sub>10</sub> VOCs, photolysis frequencies and aerosol surface concentration. The measurement techniques are included in the Table 1.

During 2006 and 2008, ambient levels of VOCs were measured using an online GC-FID system built by the Research Center for Environmental Changes (RCEC; Taiwan). A detailed description of this system and QA/QC procedures can be found in

Wang et al. (Wang et al., 2004). During August 2007 and 2009, ambient VOCs were measured using a commercial GC-FID/PID system (Syntech Spectra GC955 series 600/800 analyzer) (Xie et al., 2008; Zhang et al., 2014). From 2010 to 2016, VOCs were measured using a cryogen-free online GC-MS/FID system developed by Peking University. A detailed description of this system and QA/QC procedures can be found in Yuan et al. and Wang et al. (Yuan et al., 2012; Wang et al., 2014). Formaldehyde (HCHO) concentrations were measured by a Hantzsch fluorimetry.

Photolysis frequencies (including  $j(\text{O}^1\text{D})$ ,  $j(\text{NO}_2)$ ,  $j(\text{HONO})$ ,  $j(\text{HCHO})_{\text{M}}$ ,  $j(\text{HCHO})_{\text{R}}$ ,  $j(\text{H}_2\text{O}_2)$ ) were calculated from solar actinic flux spectra measured by a spectroradiometer as described by Bohn et al. (Bohn et al., 2008). The particle number size distributions were measured by a system consisting of a Nano-SMPS (TSI DMA3085 + CPC3776) and a SMPS (TSI DMA3081 + CPC3775). Aerosol surface concentration (Sa) during 2006-2016 was calculated from the measured particle number size distributions between 3 nm and 700 nm by assuming the particles are spherical in shape.

## 2.2 Estimate of photolysis frequencies

Photolysis frequencies were measured in August 2011-2014 and 2016. The Tropospheric Ultraviolet and Visible (TUV) radiation model (version 5.3) was used to calculate photolysis frequencies in August over the entire 2006-2016 period under clear-sky conditions. TUV uses the discrete-ordinate algorithm (DISORT) with four streams and calculates the actinic flux spectra with a wavelength range of 280 – 420 nm in 1 nm steps and resolution. We used observed aerosol optical properties including AOD, single scattering albedo (SSA) and Ångström exponent (AE), total ozone column to constrain the TUV model (Madronich, 1993). The calculated values agree well with measured results as shown in Figure 1 indicating that the TUV model accurately calculated the photolysis frequencies. Data of photolysis frequencies under cloudless conditions were selected according to the presence of AOD data since AOD measurements were not possible under cloudy conditions.

## 2.3 Measurements of aerosol optical properties

Aerosol optical properties were measured with a CIMEL Sun photometer (AERONET level 1.5 and level 2.0 data collection, <http://aeronet.gsfc.nasa.gov/>) at the Beijing-CAMS site (39.933°N, 116.317°E) and at the Beijing site (39.977N, 116.381E). The instrumentation, data acquisition, retrieval algorithms and calibration procedure, which conform to the standards of the AERONET global network, are described in detail by Fotiadi et al. (Fotiadi et al., 2006). The solar extinction measurements taken every 3 minutes within the spectral range 340 – 1020 nm were used to compute AOD at 340, 380, 440, 500, 675, 870, 970 and 1020 nm. The overall uncertainty in AOD data under cloud-free conditions was 0.02 at a wavelength of 440 nm (Dubovik and King, 2000). In this study, AOD at the wavelength of 380nm was chosen for analysis. This wavelength was selected as it is more representative of  $j(\text{NO}_2)$ . In addition to AOD, that network also provided single scattering albedo (SSA) and Ångström exponent (AE) data.

Cloud optical thickness (COT) was acquired from Aura satellite measurements with a time resolution of 24 hours. Total ozone column was obtained by OMI (Ozone Monitoring Instrument), using overpass data.

## 2.4 Trend analysis method

A simple linear regression (the least-squares method) was implemented to investigate temporal trends of ozone, precursors, aerosol optical properties,  $\text{PM}_{2.5}$  and photolysis frequencies. The null hypothesis is that air pollutants and time have no linear relationship and this was tested using the standard F-statistic test (ratio of the mean-square regression to the mean-square residual). The p value associated with the F-statistic is the probability of mistakenly rejecting the null hypothesis (\*\*  $p < 0.01$ ; \*  $p < 0.05$ ). The p values for the trends of different parameters are summarized in Table 2.

## 2.5 Chemical box model

Ozone production rate,  $P(O_3)$ , is calculated by a chemical box model. This model is based on the compact Regional Atmospheric Chemical Mechanism version 2 (RACM) described by Goliff et al. (Goliff et al., 2013), which includes 17 stable inorganic species, 4 inorganic intermediates, 55 stable organic compounds and 43 intermediate organic compounds. Compounds that are not explicitly treated in the RACM are lumped into species with similar functional groups. The isoprene mechanism includes a more detailed mechanism based on the Leuven Isoprene Mechanism (LIM) proposed by Peeters et al. (Peeters et al., 2009). A detailed description of this model can be found in Tan et al. (Tan et al., 2017).

In this study, the model was constrained by measured hourly average CO, NO<sub>2</sub>, O<sub>3</sub>, SO<sub>2</sub>, NMHCs (56 species), HCHO, photolysis frequencies, temperature, pressure, and relative humidity. HONO was not measured. HONO concentrations are generally underestimated by the gas phase reaction source of HONO ( $OH + NO \rightarrow HONO$ ) in urban areas due to the emission of HONO and the heterogeneous reaction of NO<sub>x</sub> at surfaces to form HONO, both of which are related to NO<sub>x</sub> concentration. As a result, the HONO concentration was calculated according to the concentration of NO<sub>2</sub> and the observed ratio of HONO to NO<sub>2</sub> at an urban site in Beijing, which had a marked diurnal cycle (Hendrick et al., 2014). For the model calculation, the ratio of HONO to NO<sub>2</sub> is equal to 0.08 at 6:00 and decreases linearly from 0.08 to 0.01 during 6:00 - 10:00 reflecting increasing photolysis of HONO, and maintains the value of 0.01 during 10:00-18:00. In this study, we focused on daytime  $P(O_3)$  (6:00 - 18:00), thus the nocturnal HONO concentrations were not required.

RO<sub>2</sub>, HO<sub>2</sub>, OH were simulated by the box model to calculate the ozone production and loss rates as shown in Equations E1 and E2 as derived by Mihelcic et al. (Mihelcic et al., 2003).

$$P(O_3) = k_{HO_2+NO} [HO_2][NO] + \sum (k_{RO_2+NO}^i [RO_2^i][NO]) - k_{OH+NO_2} [OH][NO_2] - L(O_3) \quad E1$$

$$L(O_3) = (\theta j(O^1D) + k_{OH+O_3} [OH] + k_{HO_2+O_3} [HO_2] + \sum (k^j_{alkene+O_3} [alkene^j]) [O_3] \quad E2$$



where  $\theta$  is the fraction of  $O^1D$  from ozone photolysis that reacts with water vapor.  $i$  and  $j$  represent the number of species of  $RO_2$  and alkenes, respectively.

The model runs were performed in a time-dependent mode with two days' spin-up. A 24 h lifetime was introduced for all simulated species, such as secondary species and radicals, to approximately simulate dry deposition and other losses of these species (Lu et al., 2013). This lifetime corresponds to an assumed deposition velocity of  $1.2 \text{ cm s}^{-1}$  and a well-mixed boundary layer height of about 1 km. Sensitivity tests show that this assumed deposition lifetime has a relatively small influence on the reactivity of modeled oxidation products and  $RO_x$  radicals.

Aerosols can influence  $O_3$  production by heterogeneous reactions such as uptake of  $HO_2$ ,  $NO_2$ ,  $N_2O_5$  and  $NO_3$ . For these species, the heterogeneous uptake of  $HO_2$  is expected to have the largest effect on rapid ozone production in summertime and VOC-limited conditions (Li et al., 2019a). Thus, the effect of heterogeneous reaction of  $HO_2$  on ozone production was simulated in the chemical box model using RH corrected aerosol surface concentration ( $S_{aw}$ ) and uptake coefficient of  $HO_2$ . The rate of change in  $HO_2$  due to irreversible uptake is expressed by E3.

$$\frac{dC}{dt} = \frac{\gamma_{HO_2} \times S_{aw} \times v \times C}{4} \quad E3$$

Where  $C$ ,  $v$ , and  $\gamma_{HO_2}$  are the gas phase concentration, mean molecular velocity, and uptake coefficient, respectively. To derive  $S_{aw}$  we used the measured hygroscopic factor (Liu et al., 2009) and measured RH to correct the measurement-derived  $S_a$  to ambient conditions. In this study, we chose  $\gamma_{HO_2} = 0.2$  provided by laboratory measurements of  $HO_2$  uptake by aerosol particles collected at two mountain sites in eastern China (Taketani et al., 2012). The effects of  $HO_2$  uptake on  $P(O_3)$  in Beijing in 2006 were simulated assuming that the product of  $HO_2$  uptake by aerosols is either  $H_2O$  or  $H_2O_2$ . The results indicate that the two scenarios showed no significant difference because the recycling of  $HO_x$  radicals from  $H_2O_2$  is inefficient (Li et al., 2019a). In the following simulations in this study, the product of  $HO_2$  uptake by aerosols is taken to be  $H_2O$ .

Heterogeneous uptake of  $N_2O_5$ ,  $NO_2$  and  $NO_3$  was included in the chemical box

model. This includes  $\gamma_{\text{N}_2\text{O}_5} = 0.007$  for converting  $\text{N}_2\text{O}_5$  to  $\text{HNO}_3$  (Wang et al., 2017),  $\gamma_{\text{NO}_2} = 1 \times 10^{-5}$  for conversion of  $\text{NO}_2$  to HONO and  $\text{HNO}_3$  (which yields a good simulation of HONO/ $\text{NO}_2$  concentration ratios in China (Shah et al., 2020)) and  $\gamma_{\text{NO}_3} = 1 \times 10^{-3}$  for conversion of  $\text{NO}_3$  to  $\text{HNO}_3$  (Jacob, 2000).

## 3 Results and discussion

### 3.1 Trend of ozone

Ozone pollution levels can be characterized by a number of metrics. Table 3 lists 10 ozone metrics and their definition summarized by Lu et al. (2018). We classify these indicators into four categories: (1) metrics that characterize general levels of ozone: median value of hourly ozone concentrations (median), daily maximum 8 h average ozone concentration (MDA8) and daytime average ozone concentration (DTAvg); (2) metrics that characterize extreme levels of ozone: daily maximum 1 h average ozone concentration (MDA1), 98th percentile of hourly ozone concentrations (Perc98) and 4th highest MDA8 (4MDA8); (3) metrics that characterize ozone exposure: cumulative hourly ozone concentrations of  $>40$  ppb (AOT40) and sum of positive differences between MDA8 and a cutoff concentration of 35 ppb (SOMO35); (4) The metrics that characterize the days when the ozone exceeds the standard: total number of days with MDA8 values of  $>70$  ppb (NDGT70) and number of days with the ozone concentration exceeding the Chinese grade II national air quality standard (Exceedance). Figure 2 presents variations in these four categories of ozone metrics at PKUERS site during the study periods. The results show that overall all metrics increased during the 12 year period. However, the percent increase, the p value and the correlation coefficient vary between metrics. The median, DTAvg, and MDA8 indicators, which characterize the general concentration levels of ozone, increased at rates of 2.8% - 5.7%  $\text{yr}^{-1}$ . The metrics that characterize the extreme concentration levels of ozone increased more slowly (1.2% - 2.7%  $\text{yr}^{-1}$ ). Among them, Perc98 had the smallest rate of increase, only 1.2%  $\text{yr}^{-1}$ , and the correlation is not significant ( $p = 0.29$ ,  $r^2 = 0.11$ ). This indicates that

increases in the extreme ozone pollution was less significant. In contrast, the increase rates of the ozone exposure metrics AOT40 and SOMO35 were faster,  $8.4\% \text{ yr}^{-1}$  and  $8.3\% \text{ yr}^{-1}$ , respectively, than the metrics that characterize ozone concentrations. The NDGT70 and Exceedance metrics, related to the number of days of ozone exceeding the standard, showed the fastest increases,  $10\% \text{ yr}^{-1}$  and  $9.8\% \text{ yr}^{-1}$ , respectively.

As shown in Figure 3, from 2005 to 2016 MDA8  $\text{O}_3$  concentrations increased at a rate of  $2.3 \pm 1.2 \text{ ppbv}$  ( $3.3 \pm 1.8\%$ )  $\text{yr}^{-1}$  ( $r^2 = 0.66$ ) at the PKUERS site, which corresponds to a total MDA8 ozone concentration increase of 25.3 ppbv. Meanwhile,  $\text{O}_x$  ( $\text{O}_3 + \text{NO}_2$ ) concentrations increased at a slower rate of  $1.4 \pm 0.6 \text{ ppbv}$  ( $1.9 \pm 0.8\%$ )  $\text{yr}^{-1}$ , due to the decrease in  $\text{NO}_x$  concentrations (Figure 5).

Temperature and wind speed, which can directly influence ozone production and concentrations, showed no significant trend during 2005-2016 (Figure 4). The average temperatures in summer were between 26 and  $31^\circ\text{C}$ . The temperature in 2005 was the lowest and in 2007 it was the highest. The average wind speeds were less than  $2.5 \text{ m s}^{-1}$  in all years. The average relative humidity may have decreased slightly ( $\sim 1.5\% \text{ yr}^{-1}$ ). In summary, we believe that meteorological factors did not play more than a minor role in the overall Beijing  $\text{O}_3$  trend. Therefore, our discussion focuses on photochemical processes.

The ozone concentration observed at a receptor site depends on two contributions: regional background ozone and local photochemical production. We have no direct measurements of the long-term trend of regional background ozone in Beijing, but others have reported measurements of ozone at regional background sites in China. At a baseline Global Atmospheric Watch (GAW) station in the northeastern Tibetan Plateau region (Mt Waliguan,  $36.28^\circ \text{ N}$ ,  $100.9^\circ \text{ E}$ ) the average annual daytime ozone concentration increased at a rate of  $0.24 \text{ ppb yr}^{-1}$ , over the 1994 to 2013 period, but there was no significant trend in summer (Xu et al., 2018). The measurement at a rural station (Dingling site) in Beijing ( $116.22^\circ \text{ E}$ ,  $40.29^\circ \text{ N}$ , 34 km northwest of the observation site in this study) showed a decrease of ozone at a rate of  $-0.47 \text{ ppb yr}^{-1}$  over the 2004 to 2015 period (Zheng et al., 2016). The MDA8 ozone concentration at

the Shangdianzi site, a background station in Beijing, showed an increasing trend of 1.1 ppb yr<sup>-1</sup> during 2004-2014 (Ma et al., 2016a). Additionally, there were very small trends of O<sub>3</sub> concentrations at the background site (Dongtan) in Shanghai, located to the south of the North China Plain (Gao et al., 2017). However, these background sites in Beijing and Shanghai may be strongly affected by local emissions. MDA8 ozone concentrations at the Changdao site, a background site in the east of the North China Plain that is much less influenced by local emissions, increased slowly (+1.2 ppbv yr<sup>-1</sup>, r<sup>2</sup>=0.11), but that rate is not statistically significant (p = 0.25) during 2013-2019 (Figure S1). Based on these reports of smaller and variable trends, we assume that the trend in regional background ozone in the North China Plain made only a minor contribution to the relatively larger ozone trend observed at the PKUERS site (+2.3 ± 1.2 ppbv yr<sup>-1</sup>, r<sup>2</sup>=0.66, p = 0.001). We thus surmise that the increase in O<sub>3</sub> at the PKUERS site was mainly due to “local” photochemistry driven by emissions of ozone precursors from the central urban and surrounding suburban areas of Beijing.

### 3.2 Trend of gaseous precursors

This increase in ozone concentrations is opposite to the decreasing trend of its precursors, including VOCs, CO and NO<sub>x</sub> (Figure 5). The overall change of the total OH loss rate due to VOCs (VOC reactivity) was -0.36 s<sup>-1</sup> (-6.0%) yr<sup>-1</sup>. For anthropogenic VOCs, the highest reactivity was generally contributed by alkene species, with an average value over the eleven years of 2.00 ± 0.43 s<sup>-1</sup>, followed by aromatics and alkanes, with average reactivities of 1.51 ± 0.74 s<sup>-1</sup> and 0.92 ± 0.60 s<sup>-1</sup>, respectively. Thus, the alkenes and aromatics are more important for O<sub>3</sub> production than are alkanes. The trends for alkenes, aromatics, and alkanes were a decrease of 0.14 s<sup>-1</sup> (7.1%), 0.12 s<sup>-1</sup> (7.9%), and 0.065 s<sup>-1</sup> (7.0%) yr<sup>-1</sup>, respectively, indicating that alkenes and aromatics also played the dominant role in the reduction of anthropogenic VOC reactivity. The rate of decrease in VOCs at PKUERS site is similar to that reported for Los Angeles by Warneke et al. and Pollack et al. (7.3-7.5% yr<sup>-1</sup> over 50 years) (Warneke et al., 2012; Pollack et al., 2013). The decrease in anthropogenic

VOCs in Los Angeles was predominantly attributed to decreasing emissions from motor vehicles due to increasingly strict emissions standards. Similarly, a previous study at the PKUERS site indicated that the decreasing anthropogenic VOC was mainly attributed to the reduction of gasoline evaporation and vehicular exhaust under the implementation of stricter emissions standards for new vehicles and specific control measures for in-use vehicles (Wang et al., 2015a). For naturally emitted VOCs, mainly isoprene, the OH reactivity had little trend with large fluctuations, as the emissions of plants vary greatly with temperature and light intensity. Therefore, the decrease in total VOCs reactivity was dominated by the decrease in anthropogenic VOCs. Similarly, CO, which is mainly contributed by anthropogenic emissions, decreased rapidly ( $9.3\% \text{ yr}^{-1}$ ) during 2006–2016.

NO<sub>x</sub> data in 2005 were not available. Therefore, the trend of NO<sub>x</sub> during 2006–2016 was analyzed. Daytime concentrations of NO<sub>x</sub> at the PKUER site also decreased significantly from 2006 to 2016 (Figure 5), with a slope (excluding 2008, which had a much lower NO<sub>x</sub> concentration due to enhanced emission controls implemented during the Olympic Games) of  $-1.48 \text{ ppbv yr}^{-1}$  ( $-5.5\% \text{ yr}^{-1}$ ,  $r^2 = 0.81$ ). The decrease in NO<sub>x</sub> was mainly due to the reduction in vehicle exhaust and coal combustion (Zhao et al., 2013). The decrease in NO<sub>x</sub> was significantly faster than that found in Los Angeles by Pollack et al. ( $2.6\% \text{ yr}^{-1}$  over 50 years) (Pollack et al., 2013). In contrast to Beijing, Los Angeles O<sub>3</sub> concentrations have continuously decreased from 1980 to 2010 (Parrish et al., 2016). The ratio of the rates of decrease of VOCs and NO<sub>x</sub> in Los Angeles (2.9) is significantly greater than unity and larger than that at the PKUER site (1.1), which possibly can be a contributing cause of the opposite trends of ozone in the two regions. It worth noting that the precursor concentrations in 2008, the Olympic Games year, were particularly low, but that ozone was nevertheless on the regression line. The monthly average ratio of VOC reactivity to NO<sub>x</sub> concentration in 2008 is  $0.28 \text{ s}^{-1} \text{ ppbv}^{-1}$ , higher than the average ratio of VOC reactivity to NO<sub>x</sub> concentration during 2006–2016 ( $0.24 \text{ s}^{-1} \text{ ppbv}^{-1}$ ). The adverse reduction ratio of VOC to NO<sub>x</sub> is the main cause of inefficient reduction in O<sub>3</sub> level in 2008, which is consistent with the study of Chou et

al. (2011).

Since 2013, under the implementation of the Action Plan on Air Pollution Prevention and Control ([http://www.gov.cn/zwggk/2013-09/12/content\\_2486773.htm](http://www.gov.cn/zwggk/2013-09/12/content_2486773.htm)), more stringent emission control measures were implemented to restrict industrial and vehicle emission. As a result, there are indications that both VOCs and NO<sub>x</sub> decreased faster over the 2013 to 2016 period:  $0.81 \text{ s}^{-1} \text{ yr}^{-1}$  ( $16\% \text{ yr}^{-1}$ ,  $r^2 = 0.71$ ) and  $1.94 \text{ ppbv yr}^{-1}$  ( $9.3\% \text{ yr}^{-1}$ ,  $r^2 = 0.78$ ) for VOC reactivity and NO<sub>x</sub>, respectively. This could be the cause of the decline in O<sub>3</sub> concentrations from 2014 to 2016.

### 3.3 Trend of particulate matter

From 2009 to 2016, PM<sub>2.5</sub> concentrations declined rapidly, achieving the air quality standard of China ( $35 \mu\text{g}/\text{m}^3$ ) in 2016 (Figure 6). Since 2000, Beijing had implemented 16 phases' air pollution control measures, mainly including the controlling of industry, motor vehicle, coal combustion and fugitive dust pollution, which was effective for the reduction in PM<sub>2.5</sub> (Lang et al., 2017). Especially the strengthening of the reduction in coal combustion, which was gradually replaced by natural gas since 2004, favored improved visibility in Beijing (Zhao et al., 2011).

As shown in Figure 6, from 2006 to 2016 AOD decreased at a rate of  $9.3\% \text{ yr}^{-1}$ . The correlation between AOD and PM<sub>2.5</sub> can be determined from the observations of PM<sub>2.5</sub> and AOD in August during 2009-2016 at the PKUERS site (Figure 7). AOD and PM<sub>2.5</sub> are linearly correlated with a correlation coefficient of +0.74. This result indicates that the decrease in PM<sub>2.5</sub> was the primary cause of the reduction in AOD. In addition to PM<sub>2.5</sub>, relative humidity also has an important effect on AOD. The decrease in relative humidity during 2006-2016 (Figure 4) would reduce the hygroscopic growth of aerosol, leading to a weakened extinction effect of particulate matter on solar radiation (Qu et al., 2015). It is worth noting that although PM<sub>2.5</sub> in 2011 was lower than that in 2010, AOD in 2011 was higher than that in 2010 (Figure 6). For one reason, the relative humidity in 2011 was higher. Additionally, the aerosol type, atmospheric boundary layer height and the vertical structure of aerosol

distribution also affects the dependence of AOD on PM<sub>2.5</sub> (Zheng et al., 2017), probably contributing to the scatter about the AOD versus PM<sub>2.5</sub> relationship shown in Figure 7.

Monthly mean AE (380/550 nm) in August showed no overall trend during 2006-2016 (Figure 8). The monthly AE means were between 0.87 and 1.2, suggesting that the size-distribution of aerosol was generally stable during this period. Monthly mean SSA (440 nm) in August showed an upward trend of  $+0.004 \text{ yr}^{-1}$  ( $+0.45\% \text{ yr}^{-1}$ ,  $p = 0.001$ ) during 2006-2016 (Figure 8), indicating the proportion of the light-absorbing component of aerosols (e.g. black carbon) has decreased, due to the stringent and effective controls on the burning of biomass/biofuel and coal (Ni et al., 2014; Cheng et al., 2013). This result is consistent with the studies of Lang et al. and Wang et al., which indicated that black carbon in China's mega cities has decreased rapidly over the past decade (Wang et al., 2016b; Lang et al., 2017).

### 3.4 Trend of photolysis frequencies

The influence of solar radiation on O<sub>3</sub> photochemistry can be described by actinic flux (or photolysis frequencies). We chose  $j(\text{NO}_2)$  as a representative photolysis frequency to analyze the trend of actinic flux. Wang et al (2019) studied the quantitative relationship between  $j(\text{NO}_2)$  and AOD at the PKUERS site, and found that  $j(\text{NO}_2)$  and AOD showed a clear nonlinear negative correlation at a given SZA, with slopes ranging from -1.3 to  $-3.2 \times 10^{-3} \text{ s}^{-1}$  at  $\text{AOD} < 0.7$ , indicating a significant extinction effect of AOD on actinic flux near the ground.

The  $j(\text{NO}_2)$  calculated by the TUV model under clear-sky conditions shows an upward trend of  $3.6\% \text{ yr}^{-1}$  from 2005 to 2016 and agrees well with the 5 years of observed values from 2011 to 2016 (Figure 6). According to sensitivity analysis of TUV, the decrease in AOD plays a dominant role in the  $j(\text{NO}_2)$  increase, contributing about 80% of the total. Additionally, the increase in SSA also contributes significantly to  $j(\text{NO}_2)$  increase, contributing about 17%.

In addition to aerosol optical properties, the photolysis frequency in the planetary

boundary layer is affected by other factors, including cloud extinction, ground reflection, absorption by gases such as  $O_3$ , and Rayleigh scattering by gases. The ground reflection is relatively stable for different years in the same city with stable ground covering. The change in Rayleigh scattering of gases and absorption of  $NO_2$ ,  $SO_2$  and  $HCHO$  plays a negligible role in the variation in photolysis frequencies according to sensitivity analysis of TUV model. This is consistent with the results of Barnard et al. (Barnard et al., 2004). As shown in Figure 9, the total ozone column fluctuated between 285-307 DU without a significant overall trend. The magnitude of total ozone column variation (22 DU) can change  $j(O^1D)$  by about 10%, but plays a negligible role in changing other photolysis frequencies according to sensitivity analysis using the TUV model. The cloud optical thickness (COT) for most years was relatively stable, ranging from 6 to 8, but in 2005, 2012 and 2015 COT was significantly larger (Figure 9). As there was no significant trend of COT, we surmised that the light-extinction effect of clouds did not play a key role in determining the trend of photolysis frequencies.

### **3.5 Combined effect of changes in ozone precursors and aerosols on ozone production**

We investigated the overall effect of the changes in VOCs,  $NO_x$ , photolysis frequency, and aerosol uptake of  $HO_2$  on ozone production rate using the chemical box model. We focus on the period during 2006-2016 due to the lack of  $NO_x$  data in 2005. By testing the response of  $P(O_3)$  as calculated from Equation E1 to the changes of VOCs and  $NO_x$  concentrations (Figure 10), we concluded that photochemical environment of the PKUERS site was, on average, in the VOC-limited regime. This result is consistent with previous studies (Zhang et al., 2014; Chou et al., 2011). Under this condition, the long-term decrease in VOCs in Beijing has contributed to a decrease in  $P(O_3)$ , while the decrease in  $NO_x$  has tended to increase  $P(O_3)$ . As shown in Figure 11, when the increase in photolysis frequencies and aerosol uptake of  $HO_2$  were not included in the calculation, the simulated daytime average  $P(O_3)$  decreased



slightly at a rate of  $1.1\% \text{ yr}^{-1}$ . This indicates that the ratio of the rates of decrease of VOCs and  $\text{NO}_x$  (about 1.1) is nearly inefficient in reducing ozone production in Beijing. However, when the increase in photolysis frequencies was included in the model calculation, the calculated daytime average  $\text{P}(\text{O}_3)$  showed an increasing trend of  $2.2\% \text{ yr}^{-1}$ . This result indicates that the increase in photolysis frequencies more than compensated for the downward trend of  $\text{O}_3$  production driven by decreased VOCs and  $\text{NO}_x$ , leading to increasing  $\text{O}_3$  production through the decade. The photochemical box model calculations indicate that the increase in photolysis frequencies has two major impacts on  $\text{P}(\text{O}_3)$  - an increase in primary production of OH through accelerated photolysis of  $\text{O}_3$ , HONO, HCHO and other carbonyl compounds, and an accelerated radical recycling of OH as VOCs are oxidized. As particulate matter has decreased and photolysis frequencies correspondingly have increased, a more rapidly decreasing rate of the VOC to  $\text{NO}_x$  ratio is required to achieve a significant reduction in  $\text{O}_3$  in the future.

The simulated  $\text{P}(\text{O}_3)$  in the afternoon hour (12:00-15:00) when ozone production is active and HO<sub>x</sub> levels are high increased at a rate of  $1.3\% \text{ yr}^{-1}$ , which is lower than the increasing rate of daytime average  $\text{P}(\text{O}_3)$  ( $2.2\% \text{ yr}^{-1}$ ) (Figure S2). Hollaway et al. (2019) show that the impacts of aerosols on the summertime photolysis of  $\text{NO}_2$  and ozone at surface in Beijing are important before 11:00 am and after 3:00 pm but very limited in afternoon hours due to smaller SZA and lower light absorption of aerosol (i.e. higher SSA) in the afternoon. However, the diurnal variation of simulated  $\text{P}(\text{O}_3)$  in this study indicates that the influence of aerosols on  $\text{P}(\text{O}_3)$  is still significant in the afternoon, leading to average  $\text{P}(\text{O}_3)$  decreased by  $\sim 17\%$  (Figure S3), which is slightly lower than the mean daytime decrease (25%). This is because the average AOD in the afternoon (1.4) is significantly higher than that before 11:00 am (0.94) and after 3:00 pm (1.1) despite the smaller SZA and higher SSA.

When we include heterogeneous uptake of  $\text{HO}_2$  in the model, the calculated  $\text{P}(\text{O}_3)$  increases at a faster rate of  $2.9\% \text{ yr}^{-1}$  due to the overall reduced aerosol surface

concentration ( $S_a$ ), which reduces heterogeneous uptake of  $HO_2$  (Figure 11). This result indicates that the effect of heterogeneous uptake of  $HO_2$  contributed roughly  $0.7\% \text{ yr}^{-1}$  to the  $P(O_3)$  increase. Hence, our result indicates that the increase in photolysis rates due to PM decrease plays a more important role than the decrease in heterogeneous uptake of  $HO_2$  by aerosols in accelerating ozone production in Beijing. Previous measurements indicate that the uptake coefficient varies widely from 0.003 to 0.5 with a strong dependence on the aerosol concentration of transition metal ions such as Cu(II) (Zou et al., 2019; Taketani et al., 2008; Lakey et al., 2015; Matthews et al., 2014; Lakey et al., 2016). This strong dependence on aerosol composition implies that a single assumed value for  $\gamma_{HO_2} = 0.2$  has large uncertainty.  $\gamma_{HO_2} = 0.2$  used in our simulation is likely an overestimate of the effect of heterogeneous uptake of  $HO_2$  on ozone production rate at PKUERS site.

A few heterogeneous chemical reactions of nitrogen oxides are thought to be potential influential factors of ozone production. For example, the heterogeneous uptake of  $NO_2$  to produce  $HNO_3$  and  $HONO$ , and the heterogeneous uptake of  $NO_3$  and  $N_2O_5$  to produce  $HNO_3$ . Our simulation indicates that the reduced heterogeneous uptake of  $NO_x$  caused  $P(O_3)$  to increase by only  $\sim 2.2\%$  during 2006-2016. Li et al. (2019b) also reported that the effect of heterogeneous uptake of nitrogen oxides on ozone is very small under VOC-limited and summertime conditions in North China Plain. Our simulated result in summertime Beijing, where VOC-limited photochemistry dominates, is consistent with the result of Li et al. (2019b).

In summertime, PM in the Beijing urban area is mainly formed by the secondary conversion of gaseous precursors (Han et al., 2015; Guo et al., 2014), indicating that VOCs and  $NO_x$  are not only the precursors of ozone, but also the main precursors of PM in this urban area. In addition, observations in Beijing have shown that the secondary components of PM, including secondary organic matter, ammonium sulfate and ammonium nitrate, dominate the light extinction of PM (Han et al., 2014; Han et al., 2017; Wang et al., 2015b). As a result, reductions of VOCs and  $NO_x$  are expected to lead to a decrease in secondary PM formation, and thus to further enhancement in solar

radiation (or actinic flux). Therefore, in order to reduce ozone effectively, the contribution of VOCs and NO<sub>x</sub> to secondary PM formation and their effect on solar radiation must be comprehensively considered. However, the summertime formation of PM is quite complex; the conversion efficiency of gaseous precursors to aerosols and the resulting influence on ozone production is a research area that requires further study.

### 3.6 Additional considerations

One limitation of this study is that the photochemical box model is constrained by surface observations, and hence may not accurately represent some aspects of the photochemistry through the full depth of the planetary boundary layer over Beijing. Here we briefly consider several of these aspects: (1) The treatment of ozone and VOC and NO<sub>x</sub> precursor concentrations likely are accurately represented, because rapid daytime vertical mixing ensures that there is only a small vertical gradient in the concentrations of these relatively long-lived species. (2) In daytime, the HONO lifetime is so short that it may be largely confined to near the surface, where it has surface sources (heterogeneous reaction of H<sub>2</sub>O and NO<sub>2</sub> and emissions on surfaces). Therefore, the estimated HONO based on near-surface NO<sub>2</sub> concentrations may overestimate average boundary layer HONO concentrations; however, in this study the influence of HONO on the calculation is relatively small, so this is not a large source of error. (3) The model is constrained by surface measurements of photolysis frequencies, but these surface measurements do not accurately quantify the actinic flux throughout the boundary layer. Figure 12 presents the vertical profiles of  $j(\text{NO}_2)$  simulated by the TUV model for aerosol properties representative of Beijing. A thick layer of aerosol effectively reduces radiation at the bottom of the layer, but not at the top, where radiation may be enhanced due to upward scattering from the aerosol below (Dickerson et al., 1997; Jacobson, 1998). Overall, vertical average  $j(\text{NO}_2)$  increased by 32% from 2006 to 2016, which is comparable to the surface increase (36%). These simulations indicate that the increased trend of  $j(\text{NO}_2)$  derived from surface observations do approximate the trend through the entire boundary layer.

However, there is a shift in the vertical profile of  $j(\text{NO}_2)$  that is important. The crossing point between  $j(\text{NO}_2)$  profile of 2006 and zero AOD profile is below PBL, while in 2016 the  $j(\text{NO}_2)$  profile crosses the zero AOD profile within the PBL. This means that as the AOD is reduced further, changes in the vertical average  $j(\text{NO}_2)$  will be limited, since increases in  $j(\text{NO}_2)$  near the top of the PBL will compensate for decreases near the surface. Additionally, this also denotes that the role of  $\text{PM}_{2.5}$  may be more important under condition like 2006, but will be limited under condition like 2016 when there is offsetting effect for PBL ozone by vertical mixing caused by larger ozone vertical gradient (Gao et al., 2020).

Quantitative studies suggested that, the impact of aerosols via affecting photolysis rates led to surface ozone concentrations decreasing by 2%–17% (Jacobson, 1998; Li et al., 2011a; Li et al., 2011b; Wang et al., 2016a). However, these studies also showed that ozone net production decreased more (15 ~ 30%) (Cai, 2013; Wang et al., 2019; Castro et al., 2001), which did not match the magnitude of the reduction in surface ozone concentrations. The difference between the two reductions in ozone production and surface ozone concentration indicates that, in addition to ozone photochemistry, there must be other ozone related physical processes influenced by the reduction in photolysis rate induced by aerosols. Model simulation indicates that aerosols lead to high concentrations of ozone aloft being entrained by turbulence from the top of the planetary boundary layer (PBL) to the surface by altering photolysis rate and partly counteracting the reduction in surface ozone photochemical production induced by aerosols. In addition, the impact of aerosols on ozone from local and adjacent regions was more significant than that from long-distance regions (Gao et al., 2020). Therefore, the accurate quantification of the effects of vertical mixing and long-distance transport on surface ozone concentration plays a critical role in the impact of aerosols on surface ozone, which needs further study in the future.

## 4 Conclusion

During the past decade, China has devoted very substantial resources to improving the environment. These efforts have improved atmospheric particulate matter loading, but ambient ozone levels have continued to increase. Based on the long-term measurements at a representative site in Beijing, we explored the factors driving the increase in ozone production. Consistent with the implementation of stringent emission control measures, concentrations of PM<sub>2.5</sub> and ozone precursors (VOCs and NO<sub>x</sub>) decreased rapidly, but in contrast O<sub>3</sub> and O<sub>x</sub> increased. This investigation finds that the primary cause of the O<sub>3</sub> increase is that decreasing PM concentrations led to an increase in actinic flux, which in turn increased the photochemical production of ozone. This result indicates that the influence of aerosol on ozone production is important for determining the full manifold of atmospheric effects that result from reducing the emissions of the O<sub>3</sub> and PM precursors.

## ACKNOWLEDGEMENTS

This work was supported by the Major Program of the National Natural Science Foundation of China [Grant number 91644222]. We thank Hongbin Chen and Philippe Goloub for data management of AOD and other aerosol optical properties on AERONET.

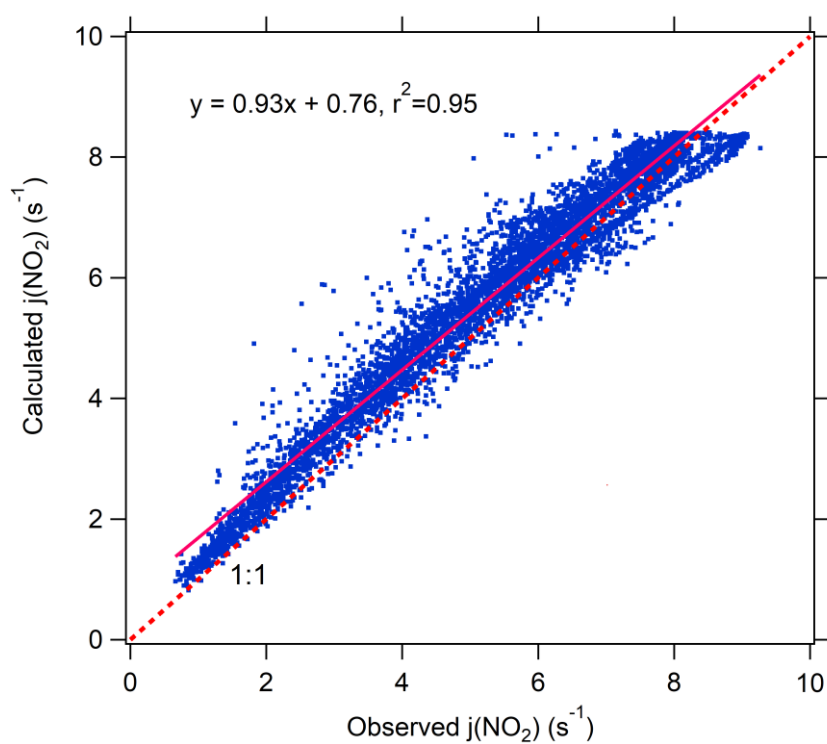

Figure 1. Correlation between Observed and calculated  $j(\text{NO}_2)$  by TUV model in Beijing in summer time during 2012 - 2015.

582

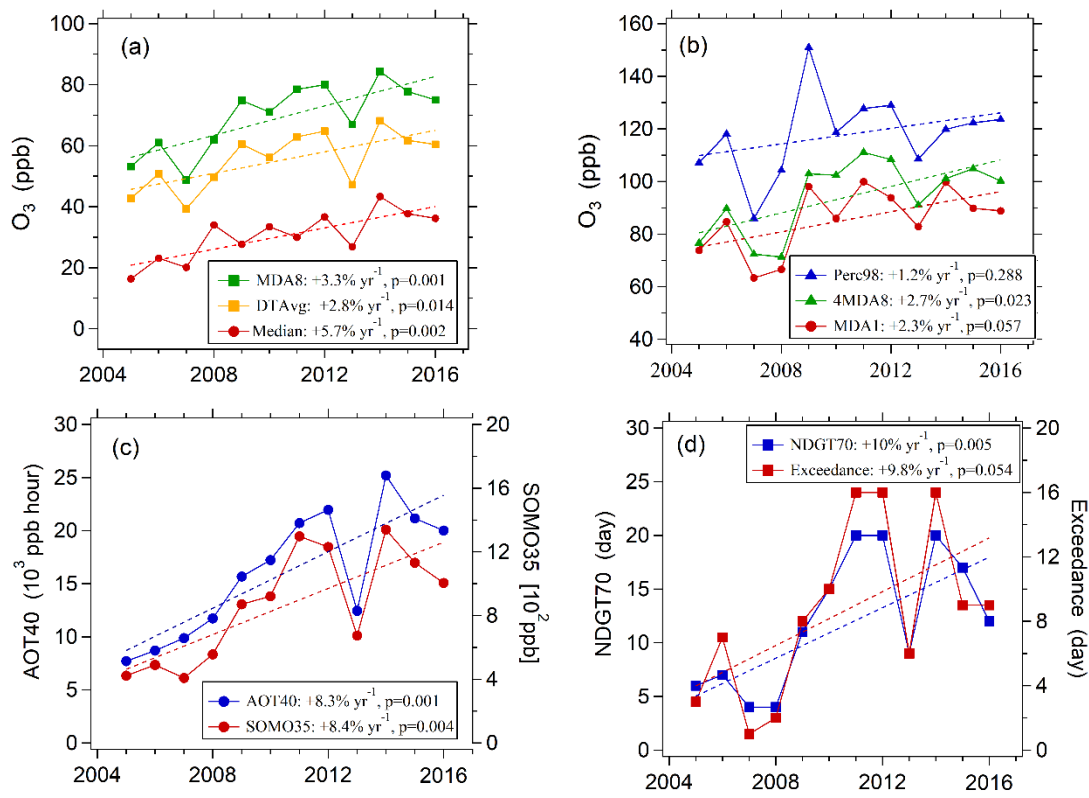

583

584

585

586

587

Figure 2. Variations in multiple O<sub>3</sub> metrics at the PKUERS site in Beijing in August between 2005 and 2016.

588  
589

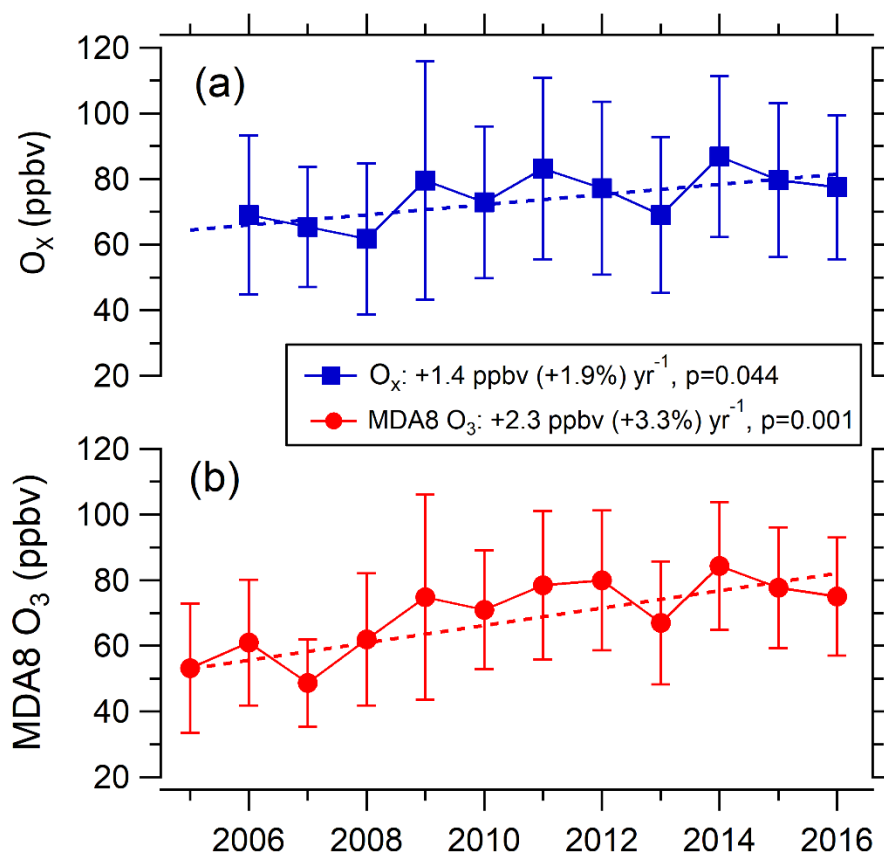

590

591 Figure 3. Variations in average MDA8 O<sub>3</sub> and daytime (7:00-19:00) average O<sub>x</sub> in  
592 Beijing, August between 2005 and 2016.

593



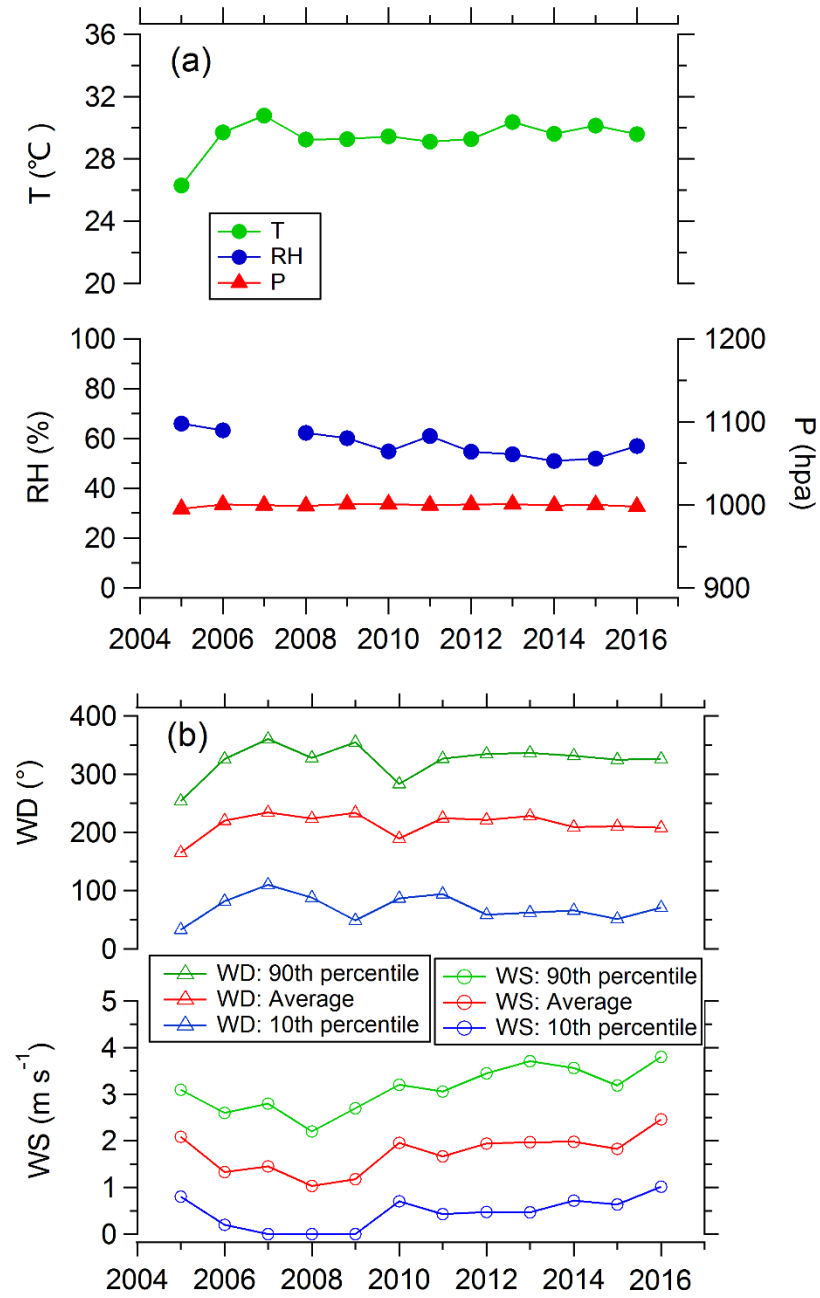

Figure 4. Variations in daytime (7:00-19:00) averages of meteorological conditions including temperature (T), relative humidity (RH), wind direction (WD) and wind speed (WS) in Beijing, August during 2005 - 2016.

599

600

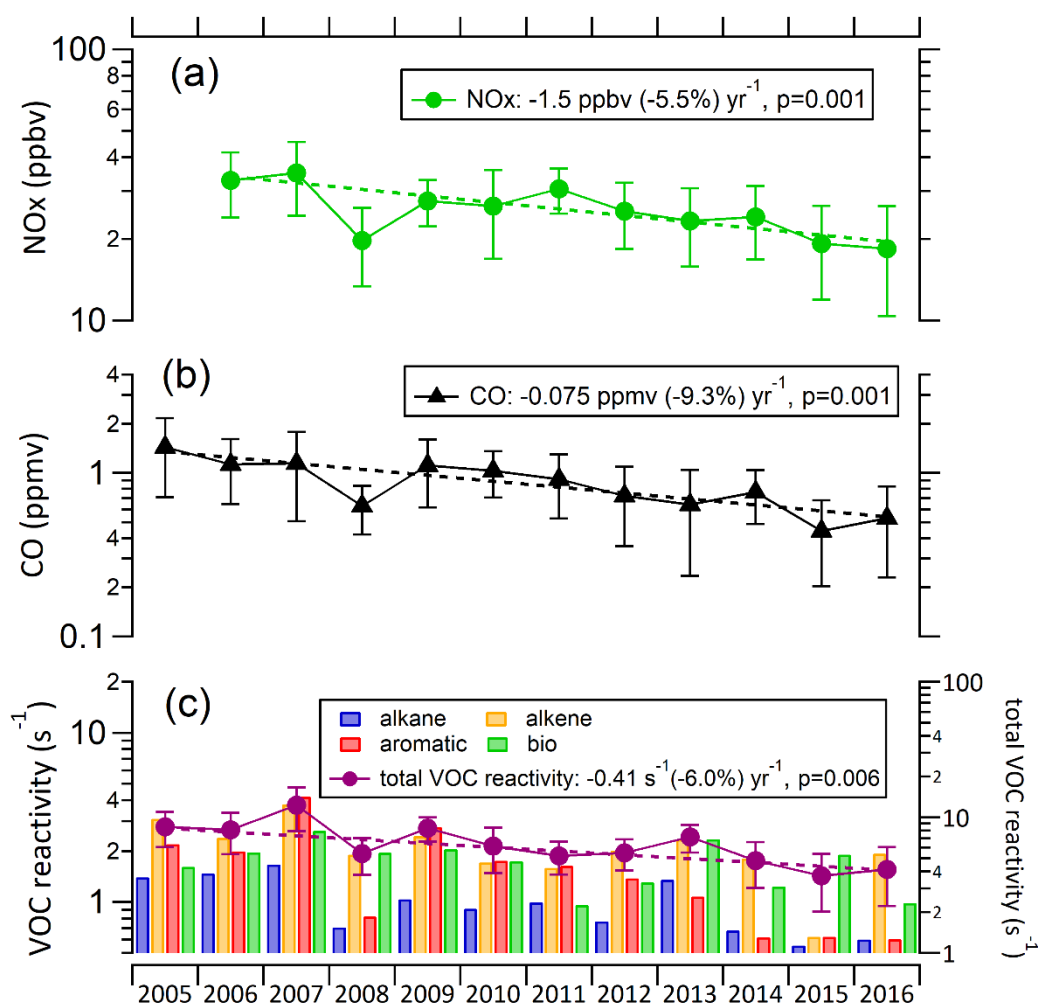

601

602 Figure 5. Variations in arithmetic mean MDA8 O<sub>3</sub>, arithmetic mean of daytime (7:00-603 19:00) O<sub>x</sub> and geometric mean of daytime NO<sub>x</sub>, CO and VOCs reactivity in Beijing,

604 August between 2005 and 2016. VOCs reactivity is depicted by reactivity of each

605 species (left axis) and total VOC reactivity (right axis). On the y-axes, a linear scale is

606 used for O<sub>3</sub> and O<sub>x</sub>, and a log-scale is used for the precursor concentrations (NO<sub>x</sub>,

607 CO and VOCs).

608

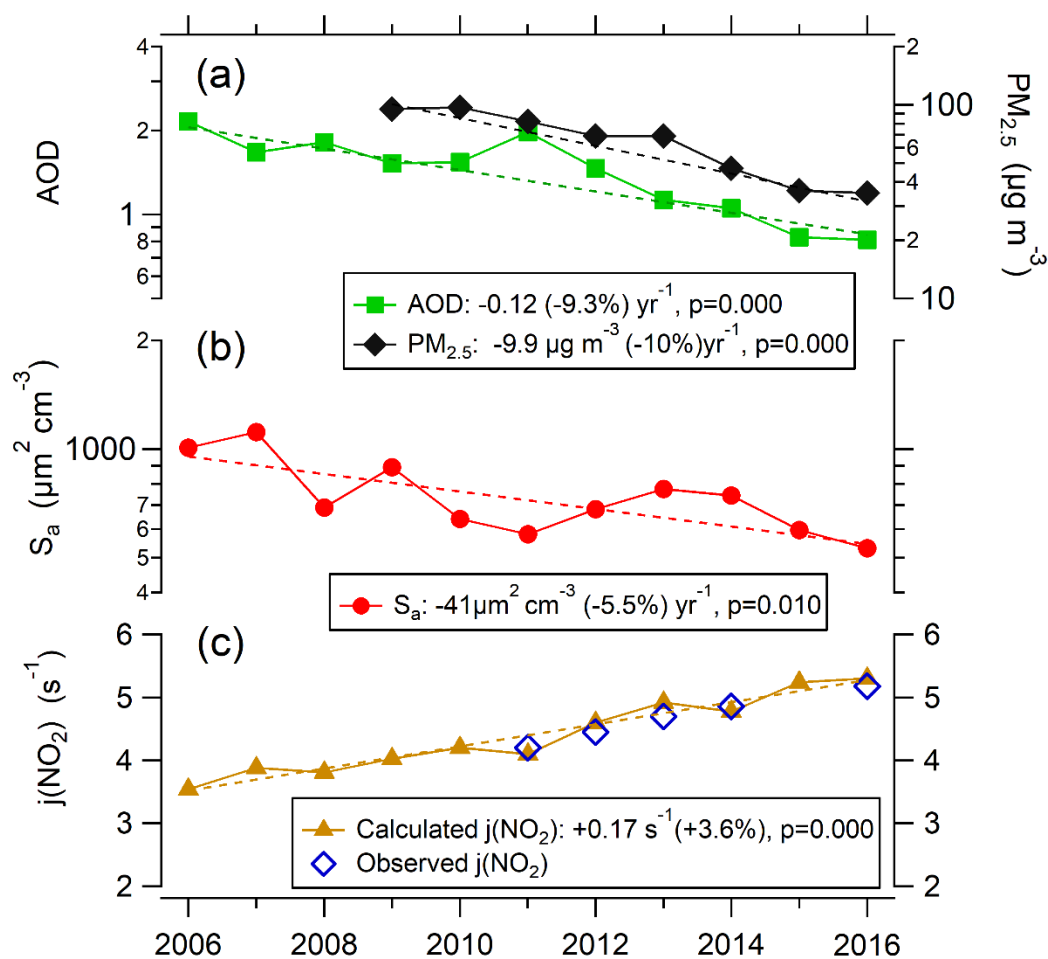

Figure 6. Variations in daytime (7:00-19:00) averages of AOD (380 nm),  $PM_{2.5}$ ,  $S_a$ ,  $j(NO_2)$  Calculated  $j(NO_2)$  by TUV in Beijing, August between 2006 and 2016. AOD and  $j(NO_2)$  are both corresponding to cloudless weather. On the y-axes, a log-scale is used for  $PM_{2.5}$ , AOD and  $S_a$  and a linear scale is used for  $j(NO_2)$ .

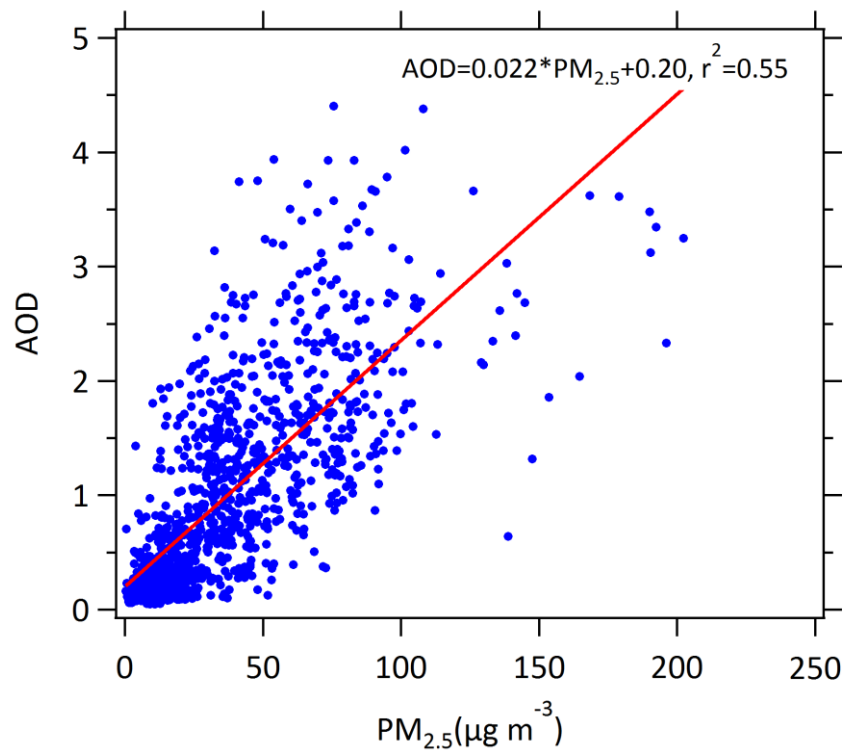

Figure 7. Correlation between AOD and PM<sub>2.5</sub> in Beijing, summertime during 2009 - 2016.

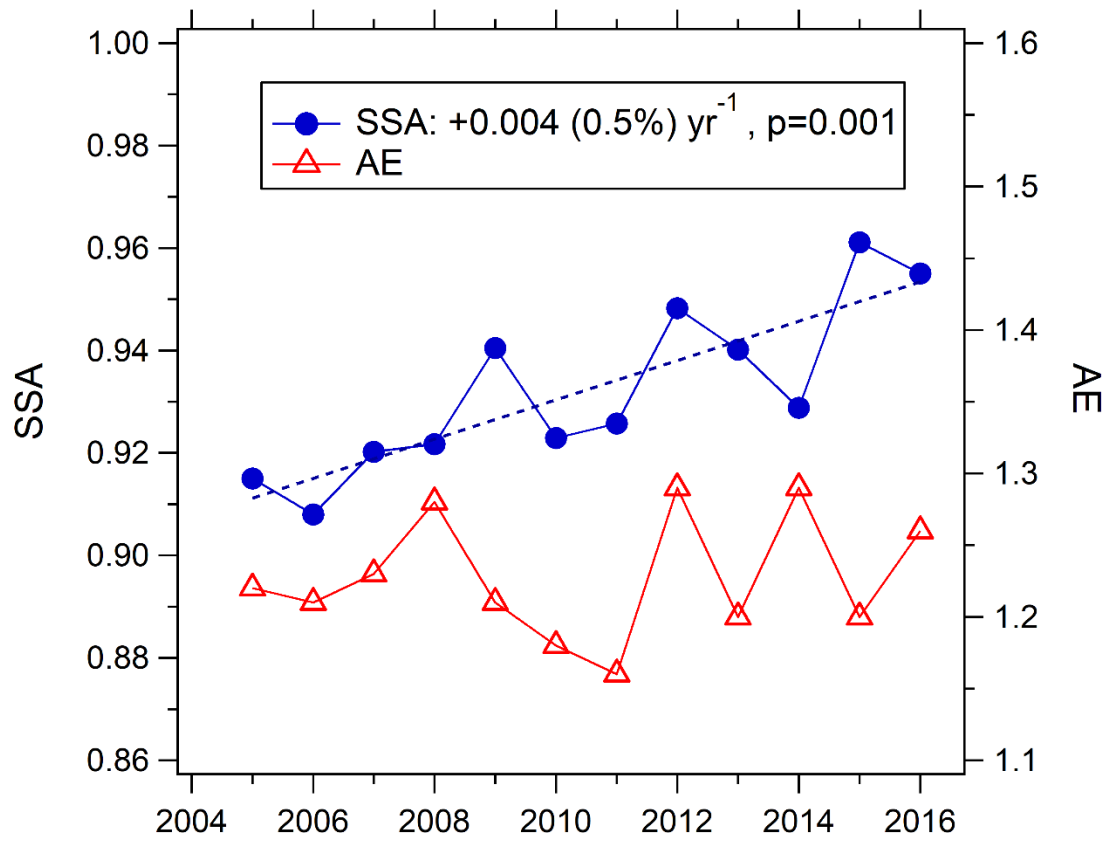

Figure 8. Variation in monthly mean single scattering albedo (SSA) and Ångström exponent (AE) in Beijing for the month of August during 2005 - 2016.

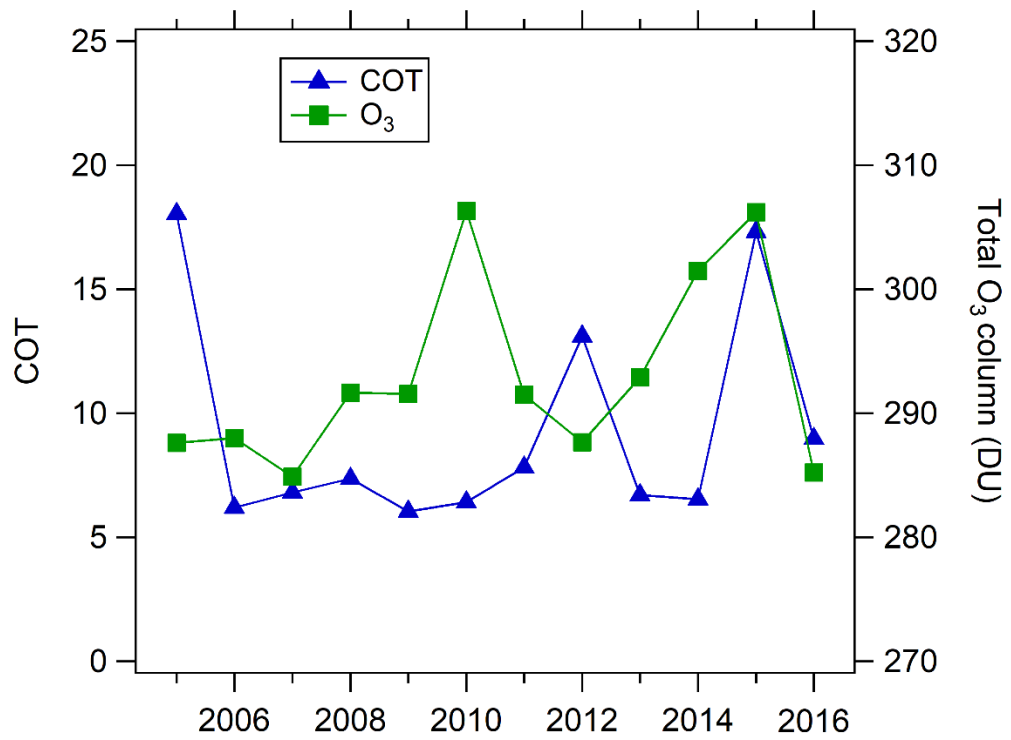

Figure 9. Variations in mean total ozone column and cloud optical thickness (COT) in Beijing for the month of August during 2005 - 2016.

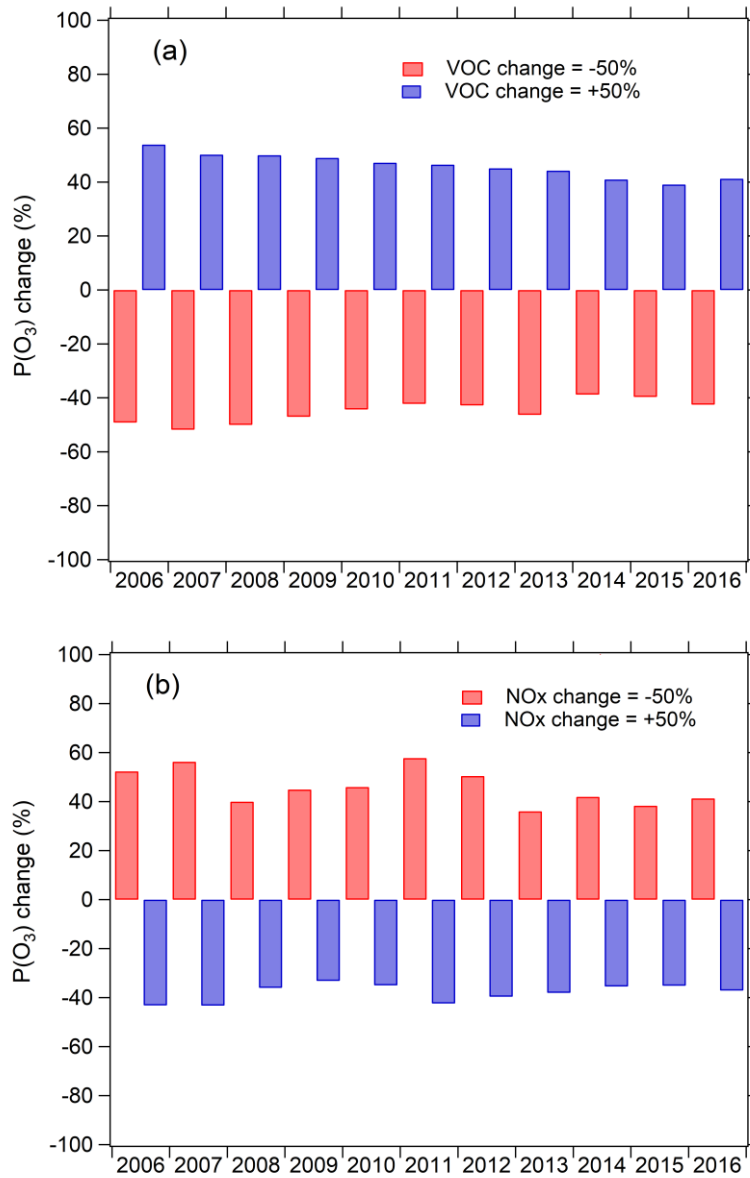

Figure 10. Sensitivity of monthly daytime mean  $P(O_3)$  to VOCs and  $NO_x$  simulated by box model during 2006 - 2016. VOCs and  $NO_x$  is increased by 50% or decreased by 50% to test the fractional change of monthly daytime mean  $P(O_3)$ .

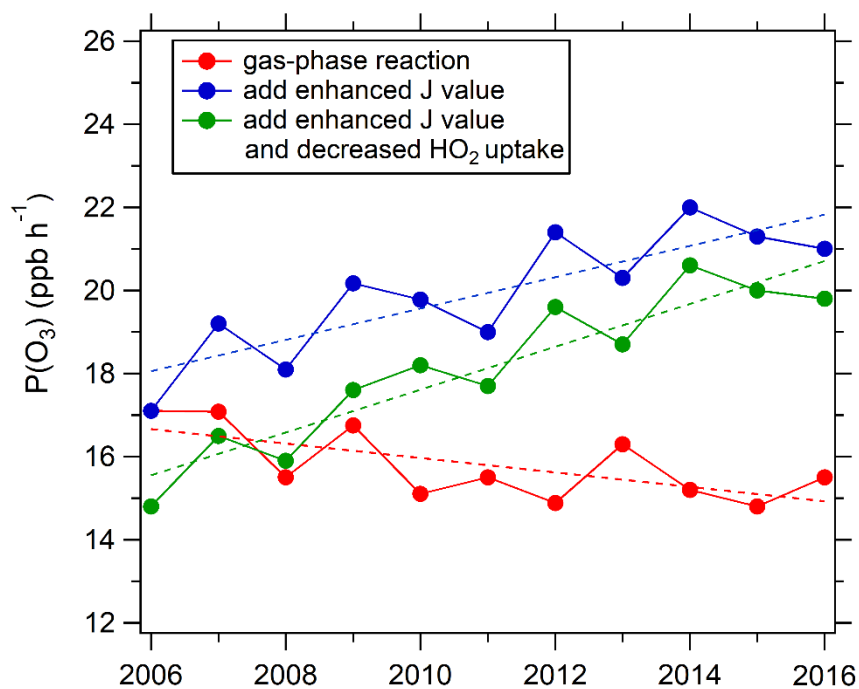

638

639 Figure 11. Trend of monthly daytime mean  $P(O_3)$  simulated by the chemical box  
 640 model. Red dots: Only the gas-phase reactions are considered in the box model  
 641 constrained by observed photolysis frequencies from 2006 for all eleven years. Blue  
 642 dots: the box model as above, but constrained by the photolysis frequencies derived  
 643 for each year. Green dots: the box model constrained by the photolysis frequencies  
 644 derived for each year with the changing aerosol uptake of  $HO_2$  also considered.  
 645



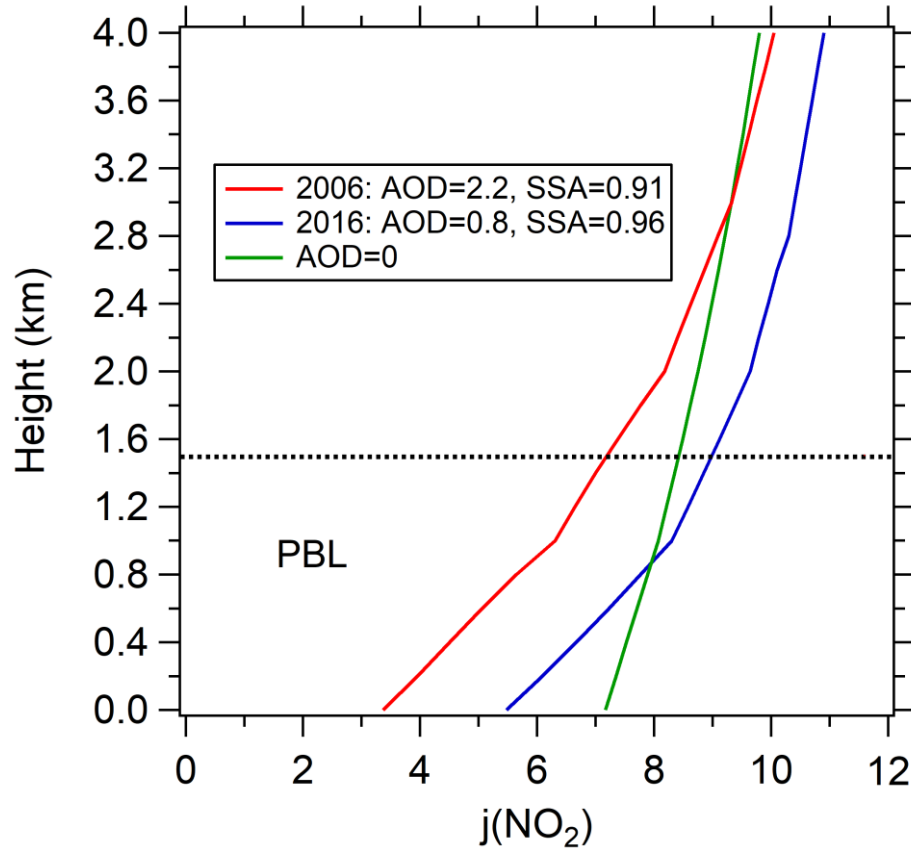

Figure 12. Vertical profiles of  $j(\text{NO}_2)$  simulated by the TUV model in Beijing. Three scenarios are simulated: The model parameters are: (1) AOD=2.2, SSA=0.91 in August 2006; (2) AOD=0.8, SSA=0.96 in August 2016; (3) AOD=0. The daytime average SZA=53° is used for all simulations. Dotted line represent the top of boundary layer.

653 Table 1. Instruments deployed in the measurement undertaken in August during 2005 -  
654 2016 and used for data analysis.

| Parameters             | Measurement technique  | Time<br>resolution | Detection<br>limit  | Accuracy |
|------------------------|------------------------|--------------------|---------------------|----------|
| Photolysis frequencies | Spectroradiometer      | 10 s               | /                   | ± 10%    |
| O <sub>3</sub>         | UV photometry          | 60 s               | 0.5 ppbv            | ± 5%     |
| NO                     | Chemiluminescence      | 60 s               | 60 pptv             | ± 20%    |
| NO <sub>2</sub>        | Chemiluminescence      | 60 s               | 300 pptv            | ± 20%    |
| CO                     | IR photometry          | 60 s               | 4 ppb               | ± 5%     |
| SO <sub>2</sub>        | Pulsed UV fluorescence | 60 s               | 0.1 ppbv            | ± 5%     |
| HCHO                   | Hantzsch fluorimetry   | 60 s               | 25 pptv             | ± 5%     |
| C2-C10VOCs             | GC-FID/MS              | 1 h                | 20-300 pptv         | ± 15~20% |
| PM <sub>2.5</sub>      | TH-2000                | 60s                | 1µg m <sup>-3</sup> | ± 5%     |
| S <sub>a</sub>         | SMPS                   | 60s                | /                   | ±3%      |
| AOD, SSA, AE           | CIMEL Sun photometer   | 5min               | 0.01                | ±5%      |

655

656

657

Table 2. p value of temporal trends for different parameters.

| Parameter                         | Period    | r <sup>2</sup> | p value | P value<br><0.01? | P value<br><0.05? |
|-----------------------------------|-----------|----------------|---------|-------------------|-------------------|
| median                            | 2005-2016 | 0.63           | 0.002   | yes               | yes               |
| perc98                            | 2005-2016 | 0.11           | 0.288   | no                | no                |
| DTAvg                             | 2005-2016 | 0.47           | 0.014   | no                | yes               |
| MDA1                              | 2005-2016 | 0.32           | 0.057   | no                | no                |
| MDA8                              | 2005-2016 | 0.66           | 0.001   | yes               | yes               |
| 4MDA8                             | 2005-2016 | 0.42           | 0.023   | no                | yes               |
| AOT40                             | 2005-2016 | 0.67           | 0.001   | yes               | yes               |
| NDGT70                            | 2005-2016 | 0.56           | 0.005   | yes               | yes               |
| SOMO35                            | 2005-2016 | 0.57           | 0.004   | yes               | yes               |
| exceedance                        | 2005-2016 | 0.32           | 0.054   | no                | no                |
| Ox                                | 2005-2016 | 0.38           | 0.044   | no                | yes               |
| CO                                | 2005-2016 | 0.87           | 0.001   | yes               | yes               |
| VOC reactivity                    | 2005-2016 | 0.52           | 0.006   | yes               | yes               |
| NO <sub>x</sub>                   | 2006-2016 | 0.81           | 0.001   | yes               | yes               |
| Calculated<br>j(NO <sub>2</sub> ) | 2006-2016 | 0.94           | 0.000   | yes               | yes               |
| AOD (380 nm)                      | 2006-2016 | 0.78           | 0.000   | yes               | yes               |
| PM <sub>2.5</sub>                 | 2009-2016 | 0.93           | 0.000   | yes               | yes               |
| Sa                                | 2006-2016 | 0.51           | 0.010   | yes               | yes               |
| SSA                               | 2005-2016 | 0.70           | 0.001   | yes               | yes               |
| AE                                | 2005-2016 | 0.03           | 0.593   | no                | no                |
| COT                               | 2005-2016 | 0.003          | 0.875   | no                | no                |
| Total O <sub>3</sub> column       | 2005-2016 | 0.15           | 0.215   | no                | no                |

658

659

660

661

662

663

664

665

666

667

668

669

Table 3. Description of Ozone Metrics used in this study.

| categories      | metric           | definition                                                                                                                                           |
|-----------------|------------------|------------------------------------------------------------------------------------------------------------------------------------------------------|
| general level   | median (ppb)     | 50th percentile of hourly concentrations                                                                                                             |
|                 | MDA8 (ppb)       | daily maximum 8 h average; the mean MDA8 O <sub>3</sub> in August of each year is used in this study.                                                |
|                 | DTAvg (ppb)      | daytime average ozone is the average of hourly ozone concentrations for the 12 h period from 07:00 to 19:00 local time                               |
| extreme level   | MDA1 (ppb)       | daily maximum 1 h average; the mean MDA1 O <sub>3</sub> in August of each year is used in this study.                                                |
|                 | Perc98 (ppb)     | 98th percentile of hourly concentrations                                                                                                             |
|                 | 4MDA8 (ppb)      | 4th highest MDA8                                                                                                                                     |
| ozone exposure  | AOT40 (ppb h)    | cumulative hourly ozone concentrations of >40 ppb                                                                                                    |
|                 | SOMO35 (ppb day) | sum of positive differences between MDA8 and a cutoff concentration of 35 ppb                                                                        |
| Exceedance days | NDGT70 (day)     | total number of days with MDA8 values of >70 ppb                                                                                                     |
|                 | Exceedance (day) | number of days with the ozone concentration exceeding the Chinese grade II national air quality standard, defined as $MDA8 > 160 \mu\text{g m}^{-3}$ |

## 673      **Reference**

- 674      Atkinson, R.: Atmospheric chemistry of VOCs and NO<sub>x</sub>, *Atmos. Environ.*, **34**, 2063-2101, 2000.
- 675      Barnard, J. C., Chapman, E. G., Fast, J. D., Schmelzer, J. R., Slusser, J. R., and Shetter, R. E.: An  
676      evaluation of the FAST-J photolysis algorithm for predicting nitrogen dioxide photolysis rates  
677      under clear and cloudy sky conditions, *Atmos. Environ.*, **38**, 3393-3403,  
678      <https://doi.org/10.1016/j.atmosenv.2004.03.034>, 2004.
- 679      Bohn, B., Corlett, G. K., Gillmann, M., Sanghavi, S., Stange, G., Tensing, E., Vrekoussis, M., Bloss, W.  
680      J., Clapp, L. J., Kortner, M., Dorn, H. P., Monks, P. S., Platt, U., Plass-Dulmer, C., Mihalopoulos, N.,  
681      Heard, D. E., Clemmshaw, K. C., Meixner, F. X., Prevot, A. S. H., and Schmitt, R.: Photolysis frequency  
682      measurement techniques: results of a comparison within the ACCENT project, *Atmospheric*  
683      *Chemistry and Physics*, **8**, 5373-5391, 10.5194/acp-8-5373-2008, 2008.
- 684      Cai, Y. F., Wang, T. J., and Xie, M.: Impacts of atmospheric particles on surface ozone in Nanjing  
685      (In Chinese), *Climatic Environment Research*, **18**, 251-260, 10.5194/acp-8-6155-2008, 2013.
- 686      Castro, T., Madronich, S., Rivale, S., Muhlia, A., and Mar, B.: The influence of aerosols on  
687      photochemical smog in Mexico City, *Atmos. Environ.*, **35**, 1765-1772,  
688      [https://doi.org/10.1016/S1352-2310\(00\)00449-0](https://doi.org/10.1016/S1352-2310(00)00449-0), 2001.
- 689      Cheng, Y., Engling, G., He, K. B., Duan, F. K., Ma, Y. L., Du, Z. Y., Liu, J. M., Zheng, M., and Weber, R.  
690      J.: Biomass burning contribution to Beijing aerosol, *Atmos. Chem. Phys.*, **13**, 7765-7781,  
691      10.5194/acp-13-7765-2013, 2013.
- 692      Chou, C. C. K., Tsai, C. Y., Chang, C. C., Lin, P. H., Liu, S. C., and Zhu, T.: Photochemical production  
693      of ozone in Beijing during the 2008 Olympic Games, *Atmos. Chem. Phys.*, **11**, 9825-9837,  
694      10.5194/acp-11-9825-2011, 2011.
- 695      de Miranda, R. M., Andrade, M. D., and Fattori, A. P.: Preliminary studies of the effect of aerosols  
696      on nitrogen dioxide photolysis rates in the city of Sao Paulo, Brazil, *Atmospheric Research*, **75**,  
697      135-148, 10.1016/j.atmosres.2004.12.004, 2005.
- 698      Dickerson, R. R., Kondragunta, S., Stenchikov, G., Civerolo, K. L., Doddridge, B. G., and Holben, B.  
699      N.: The Impact of Aerosols on Solar Ultraviolet Radiation and Photochemical Smog, *Science*, **278**,  
700      827-830, 10.1126/science.278.5339.827, 1997.
- 701      Dubovik, O., and King, M. D.: A flexible inversion algorithm for retrieval of aerosol optical properties  
702      from Sun and sky radiance measurements, *Journal of Geophysical Research-Atmospheres*, **105**,  
703      20673-20696, 10.1029/2000jd900282, 2000.
- 704      Fiore, A. M., Dentener, F. J., Wild, O., Cuvelier, C., Schultz, M. G., Hess, P., Textor, C., Schulz, M.,  
705      Doherty, R. M., Horowitz, L. W., MacKenzie, I. A., Sanderson, M. G., Shindell, D. T., Stevenson, D. S.,  
706      Szopa, S., Van Dingenen, R., Zeng, G., Atherton, C., Bergmann, D., Bey, I., Carmichael, G., Collins,  
707      W. J., Duncan, B. N., Faluvegi, G., Folberth, G., Gauss, M., Gong, S., Hauglustaine, D., Holloway, T.,  
708      Isaksen, I. S. A., Jacob, D. J., Jonson, J. E., Kaminski, J. W., Keating, T. J., Lupu, A., Marmer, E.,  
709      Montanaro, V., Park, R. J., Pitari, G., Pringle, K. J., Pyle, J. A., Schroeder, S., Vivanco, M. G., Wind, P.,  
710      Wojcik, G., Wu, S., and Zuber, A.: Multimodel estimates of intercontinental source-receptor  
711      relationships for ozone pollution, *Journal of Geophysical Research-Atmospheres*, **114**, 21,  
712      10.1029/2008jd010816, 2009.
- 713      Fotiadis, A., Hatzianastassiou, N., Drakakis, E., Matsoukas, C., Pavlakis, K. G., Hatzidimitriou, D.,  
714      Gerasopoulos, E., Mihalopoulos, N., and Vardavas, I.: Aerosol physical and optical properties in the

715 Eastern Mediterranean Basin, Crete, from Aerosol Robotic Network data, *Atmospheric Chemistry*  
716 *and Physics*, 6, 5399-5413, 10.5194/acp-6-5399-2006, 2006.

717 Gao, J., Li, Y., Zhu, B., Hu, B., Wang, L., and Bao, F.: What have we missed when studying the impact  
718 of aerosols on surface ozone via changing photolysis rates?, *Atmos. Chem. Phys. Discuss.*, 2020,  
719 1-28, 10.5194/acp-2020-140, 2020.

720 Gao, W., Tie, X. X., Xu, J. M., Huang, R. J., Mao, X. Q., Zhou, G. Q., and Chang, L. Y.: Long-term  
721 trend of O<sub>3</sub> in a mega City (Shanghai), China: Characteristics, causes, and interactions with  
722 precursors, *Science of the Total Environment*, 603, 425-433, 10.1016/j.scitotenv.2017.06.099, 2017.

723 Gerasopoulos, E., Kazadzis, S., Vrekoussis, M., Kouvarakis, G., Liakakou, E., Kouremeti, N.,  
724 Giannadaki, D., Kanakidou, M., Bohn, B., and Mihalopoulos, N.: Factors affecting O<sub>3</sub> and NO<sub>2</sub>  
725 photolysis frequencies measured in the eastern Mediterranean during the five-year period 2002-  
726 2006, *J. Geophys. Res.-Atmos.*, 117, 14, 10.1029/2012jd017622, 2012.

727 Goliff, W. S., Stockwell, W. R., and Lawson, C. V.: The regional atmospheric chemistry mechanism,  
728 version 2, *Atmospheric Environment*, 68, 174-185, 10.1016/j.atmosenv.2012.11.038, 2013.

729 Guo, S., Hu, M., Zamora, M. L., Peng, J., Shang, D., Zheng, J., Du, Z., Wu, Z., Shao, M., Zeng, L.,  
730 Molina, M. J., and Zhang, R.: Elucidating severe urban haze formation in China, *Proceedings of the*  
731 *National Academy of Sciences*, 111, 17373-17378, 10.1073/pnas.1419604111, 2014.

732 Han, T. T., Liu, X. G., Zhang, Y. H., Qu, Y., Gu, J. W., Ma, Q., Lu, K. D., Tian, H. Z., Chen, J., Zeng, L.  
733 M., Hu, M., and Zhu, T.: Characteristics of Aerosol Optical Properties and Their Chemical  
734 Apportionments during CAREBeijing 2006, *Aerosol Air Qual. Res.*, 14, 1431-1442,  
735 10.4209/aaqr.2013.06.0203, 2014.

736 Han, T. T., Liu, X. G., Zhang, Y. H., Qu, Y., Zeng, L. M., Hu, M., and Zhu, T.: Role of secondary aerosols  
737 in haze formation in summer in the Megacity Beijing, *Journal of Environmental Sciences*, 31, 51-  
738 60, 10.1016/j.jes.2014.08.026, 2015.

739 Han, T. T., Xu, W. Q., Li, J., Freedman, A., Zhao, J., Wang, Q. Q., Chen, C., Zhang, Y. J., Wang, Z. F.,  
740 Fu, P. Q., Liu, X. G., and Sun, Y. L.: Aerosol optical properties measurements by a CAPS single  
741 scattering albedo monitor: Comparisons between summer and winter in Beijing, China, *Journal of*  
742 *Geophysical Research-Atmospheres*, 122, 2513-2526, 10.1002/2016jd025762, 2017.

743 Hendrick, F., Muller, J. F., Clemer, K., Wang, P., De Maziere, M., Fayt, C., Gielen, C., Hermans, C., Ma,  
744 J. Z., Pinardi, G., Stavrou, T., Vlemmix, T., and Van Roozendaal, M.: Four years of ground-based  
745 MAX-DOAS observations of HONO and NO<sub>2</sub> in the Beijing area, *Atmospheric Chemistry and*  
746 *Physics*, 14, 765-781, 10.5194/acp-14-765-2014, 2014.

747 Hollaway, M., Wild, O., Yang, T., Sun, Y., Xu, W., Xie, C., Whalley, L., Slater, E., Heard, D., and Liu, D.:  
748 Photochemical impacts of haze pollution in an urban environment, *Atmospheric Chemistry and*  
749 *Physics*, 19, 9699-9714, 2019.

750 Hu, B., Zhao, X., Liu, H., Liu, Z., Song, T., Wang, Y., Tang, L., Xia, X., Tang, G., Ji, D., Wen, T., Wang,  
751 L., Sun, Y., and Xin, J.: Quantification of the impact of aerosol on broadband solar radiation in  
752 North China, *Scientific Reports*, 7, 44851, 10.1038/srep44851, 2017.

753 Jacob, D. J.: Heterogeneous chemistry and tropospheric ozone, *Atmos. Environ.*, 34, 2131-2159,  
754 2000.

755 Jacobson, M. Z.: Studying the effects of aerosols on vertical photolysis rate coefficient and  
756 temperature profiles over an urban airshed, *Journal of Geophysical Research: Atmospheres*, 103,  
757 10593-10604, 10.1029/98jd00287, 1998.

758 Jinfeng, Keding, Liuju, Zhong, Yubo, Duohong, Chen, Huang, Yuanhang, and Zhang: Fast

759 increasing of surface ozone concentrations in Pearl River Delta characterized by a regional air  
 760 quality monitoring network during 2006–2011, *Journal of Environmental Sciences*, 26, 23–36, 2014.  
 761 Lakey, P. S. J., George, I. J., Whalley, L. K., Baeza-Romero, M. T., and Heard, D. E.: Measurements  
 762 of the HO<sub>2</sub> Uptake Coefficients onto Single Component Organic Aerosols, *Environ. Sci. Technol.*,  
 763 49, 4878–4885, 10.1021/acs.est.5b00948, 2015.  
 764 Lakey, P. S. J., George, I. J., Baeza-Romero, M. T., Whalley, L. K., and Heard, D. E.: Organics  
 765 Substantially Reduce HO<sub>2</sub> Uptake onto Aerosols Containing Transition Metal ions, *Journal of*  
 766 *Physical Chemistry A*, 120, 1421–1430, 10.1021/acs.jpca.5b06316, 2016.  
 767 Lang, J. L., Zhang, Y. Y., Zhou, Y., Cheng, S. Y., Chen, D. S., Guo, X. U., Chen, S., Li, X. X., Xing, X. F.,  
 768 and Wang, H. Y.: Trends of PM<sub>2.5</sub> and Chemical Composition in Beijing, 2000–2015, *Aerosol Air*  
 769 *Qual. Res.*, 17, 412–425, 10.4209/aaqr.2016.07.0307, 2017.  
 770 Li, G., Bei, N., Tie, X., and Molina, L. T.: Aerosol effects on the photochemistry in Mexico City during  
 771 MCMA-2006/MILAGRO campaign, *Atmos. Chem. Phys.*, 11, 5169–5182, 10.5194/acp-11-5169-  
 772 2011, 2011a.  
 773 Li, J., Wang, Z., Wang, X., Yamaji, K., Takigawa, M., Kanaya, Y., Pochanart, P., Liu, Y., Irie, H., and Hu,  
 774 B.: Impacts of aerosols on summertime tropospheric photolysis frequencies and photochemistry  
 775 over Central Eastern China, *Atmos. Environ.*, 45, 1817–1829, 2011b.  
 776 Li, J., Chen, X. S., Wang, Z. F., Du, H. Y., Yang, W. Y., Sun, Y. L., Hu, B., Li, J. J., Wang, W., Wang, T.,  
 777 Fu, P. Q., and Huang, H. L.: Radiative and heterogeneous chemical effects of aerosols on ozone  
 778 and inorganic aerosols over East Asia, *Science of the Total Environment*, 622, 1327–1342,  
 779 10.1016/j.scitotenv.2017.12.041, 2018.  
 780 Li, K., Jacob, D. J., Liao, H., Shen, L., Zhang, Q., and Bates, K. H.: Anthropogenic drivers of 2013–  
 781 2017 trends in summer surface ozone in China, *Proceedings of the National Academy of Sciences*  
 782 *of the United States of America*, 116, 422–427, 10.1073/pnas.1812168116, 2019a.  
 783 Li, K., Jacob, D. J., Liao, H., Shen, L., Zhang, Q., and Bates, K. H.: Anthropogenic drivers of 2013–  
 784 2017 trends in summer surface ozone in China, *Proceedings of the National Academy of Sciences*,  
 785 116, 422–427, 2019b.  
 786 Liu, X., Zhang, Y., Jung, J., Gu, J., Li, Y., Guo, S., Chang, S.-Y., Yue, D., Lin, P., Kim, Y. J., Hu, M., Zeng,  
 787 L., and Zhu, T.: Research on the hygroscopic properties of aerosols by measurement and modeling  
 788 during CAREBeijing-2006, *Journal of Geophysical Research-Atmospheres*, 114,  
 789 10.1029/2008jd010805, 2009.  
 790 Liu, Z., Wang, Y., Gu, D., Zhao, C., Huey, L. G., Stickel, R., Liao, J., Shao, M., Zhu, T., Zeng, L., Amoroso,  
 791 A., Costabile, F., Chang, C. C., and Liu, S. C.: Summertime photochemistry during CAREBeijing-  
 792 2007: RO<sub>x</sub> budgets and O<sub>3</sub> formation, *Atmospheric Chemistry and Physics*, 12, 7737–7752,  
 793 10.5194/acp-12-7737-2012, 2012.  
 794 Lou, S. J., Liao, H., and Zhu, B.: Impacts of aerosols on surface-layer ozone concentrations in China  
 795 through heterogeneous reactions and changes in photolysis rates, *Atmospheric Environment*, 85,  
 796 123–138, 10.1016/j.atmosenv.2013.12.004, 2014.  
 797 Lu, K., Fuchs, H., Hofzumahaus, A., Tan, Z., Wang, H., Zhang, L., Schmitt, S. H., Rohrer, F., Bohn, B.,  
 798 Broch, S., Dong, H., Gkatzelis, G. I., Hohaus, T., Holland, F., Li, X., Liu, Y., Liu, Y., Ma, X., Novelli, A.,  
 799 Schlag, P., Shao, M., Wu, Y., Wu, Z., Zeng, L., Hu, M., Kiendler-Scharr, A., Wahner, A., and Zhang,  
 800 Y.: Fast Photochemistry in Wintertime Haze: Consequences for Pollution Mitigation Strategies,  
 801 *Environmental Science & Technology*, 53, 10676–10684, 10.1021/acs.est.9b02422, 2019.  
 802 Lu, K. D., Hofzumahaus, A., Holland, F., Bohn, B., Brauers, T., Fuchs, H., Hu, M., Haseler, R., Kita, K.,

803 Kondo, Y., Li, X., Lou, S. R., Oebel, A., Shao, M., Zeng, L. M., Wahner, A., Zhu, T., Zhang, Y. H., and  
804 Rohrer, F.: Missing OH source in a suburban environment near Beijing: observed and modelled  
805 OH and HO<sub>2</sub> concentrations in summer 2006, *Atmospheric Chemistry and Physics*, 13, 1057–1080,  
806 10.5194/acp-13-1057-2013, 2013.

807 Lu, X., Hong, J., Zhang, L., Cooper, O. R., Schultz, M. G., Xu, X., Wang, T., Gao, M., Zhao, Y., and  
808 Zhang, Y.: Severe Surface Ozone Pollution in China: A Global Perspective, *Environmental Science*  
809 *& Technology Letters*, 5, 487–494, 10.1021/acs.estlett.8b00366, 2018.

810 Ma, Z. Q., Xu, J., Quan, W. J., Zhang, Z. Y., Lin, W. L., and Xu, X. B.: Significant increase of surface  
811 ozone at a rural site, north of eastern China, *Atmospheric Chemistry and Physics*, 16, 3969–3977,  
812 10.5194/acp-16-3969-2016, 2016a.

813 Ma, Z. W., Hu, X. F., Sayer, A. M., Levy, R., Zhang, Q., Xue, Y. G., Tong, S. L., Bi, J., Huang, L., and Liu,  
814 Y.: Satellite-Based Spatiotemporal Trends in PM<sub>2.5</sub> Concentrations: China, 2004–2013,  
815 *Environmental Health Perspectives*, 124, 184–192, 10.1289/ehp.1409481, 2016b.

816 Madronich, S.: The atmosphere and UV-B radiation at ground level, in: *Environmental UV*  
817 *photobiology*, Springer, 1–39, 1993.

818 Matthews, P. S. J., Baeza-Romero, M. T., Whalley, L. K., and Heard, D. E.: Uptake of  
819 HO<sub>2</sub> radicals onto Arizona test dust particles using an aerosol flow tube, *Atmos.*  
820 *Chem. Phys.*, 14, 7397–7408, 10.5194/acp-14-7397-2014, 2014.

821 Mihelcic, D., Holland, F., Hofzumahaus, A., Hoppe, L., Konrad, S., Musgen, P., Patz, H. W., Schafer,  
822 H. J., Schmitz, T., Volz-Thomas, A., Bachmann, K., Schlomski, S., Platt, U., Geyer, A., Alicke, B., and  
823 Moortgat, G. K.: Peroxy radicals during BERLIOZ at Pabstthum: Measurements, radical budgets and  
824 ozone production, *Journal of Geophysical Research-Atmospheres*, 108, 17, 10.1029/2001jd001014,  
825 2003.

826 Monks, P. S., Archibald, A. T., Colette, A., Cooper, O., Coyle, M., Derwent, R., Fowler, D., Granier, C.,  
827 Law, K. S., Mills, G. E., Stevenson, D. S., Tarasova, O., Thouret, V., von Schneidemesser, E.,  
828 Sommariva, R., Wild, O., and Williams, M. L.: Tropospheric ozone and its precursors from the urban  
829 to the global scale from air quality to short-lived climate forcer, *Atmospheric Chemistry and*  
830 *Physics*, 15, 8889–8973, 10.5194/acp-15-8889-2015, 2015.

831 Ni, M. J., Huang, J. X., Lu, S. Y., Li, X. D., Yan, J. H., and Cen, K. F.: A review on black carbon emissions,  
832 worldwide and in China, *Chemosphere*, 107, 83–93, 10.1016/j.chemosphere.2014.02.052, 2014.

833 Parrish, D. D., Xu, J., Croes, B., and Shao, M.: Air quality improvement in Los Angeles-perspectives  
834 for developing cities, *Frontiers of Environmental Science & Engineering*, 10, 10.1007/s11783-016-  
835 0859-5, 2016.

836 Peeters, J., Nguyen, T. L., and Vereecken, L.: HO<sub>x</sub> radical regeneration in the oxidation of isoprene,  
837 *Physical Chemistry Chemical Physics*, 11, 5935–5939, 10.1039/b908511d, 2009.

838 Pollack, I. B., Ryerson, T. B., Trainer, M., Neuman, J. A., Roberts, J. M., and Parrish, D. D.: Trends in  
839 ozone, its precursors, and related secondary oxidation products in Los Angeles, California: A  
840 synthesis of measurements from 1960 to 2010, *Journal of Geophysical Research-Atmospheres*,  
841 118, 5893–5911, 10.1002/jgrd.50472, 2013.

842 Qu, W. J., Wang, J., Zhang, X. Y., Wang, D., and Sheng, L. F.: Influence of relative humidity on  
843 aerosol composition: Impacts on light extinction and visibility impairment at two sites in coastal  
844 area of China, *Atmospheric Research*, 153, 500–511, 10.1016/j.atmosres.2014.10.009, 2015.

845 Raga, G. B., Castro, T., and Baumgardner, D.: The impact of megacity pollution on local climate  
846 and implications for the regional environment: Mexico City, *Atmospheric Environment*, 35, 1805–



1811, 10.1016/s1352-2310(00)00275-2, 2001.

Real, E., and Sartelet, K.: Modeling of photolysis rates over Europe: impact on chemical gaseous species and aerosols, *Atmos. Chem. Phys.*, 11, 1711-1727, 10.5194/acp-11-1711-2011, 2011.

Shah, V., Jacob, D., Li, K., Silvern, R., Zhai, S., Liu, M., Lin, J., and Zhang, Q.: Effect of changing NO<sub>x</sub> lifetime on the seasonality and long-term trends of satellite-observed tropospheric NO<sub>2</sub> columns over China, 2020.

Taketani, F., Kanaya, Y., and Akimoto, H.: Kinetics of heterogeneous reactions of HO<sub>2</sub> radical at ambient concentration levels with (NH<sub>4</sub>)<sub>2</sub>SO<sub>4</sub> and NaCl aerosol particles, *The Journal of Physical Chemistry A*, 112, 2370-2377, 2008.

Taketani, F., Kanaya, Y., Pochanart, P., Liu, Y., Li, J., Okuzawa, K., Kawamura, K., Wang, Z., and Akimoto, H.: Measurement of overall uptake coefficients for HO<sub>2</sub> radicals by aerosol particles sampled from ambient air at Mts. Tai and Mang (China), *Atmospheric Chemistry and Physics*, 12, 11907-11916, 10.5194/acp-12-11907-2012, 2012.

Tan, Z., Fuchs, H., Lu, K., Hofzumahaus, A., Bohn, B., Broch, S., Dong, H., Gomm, S., Häsel, R., He, L., Holland, F., Li, X., Liu, Y., Lu, S., Rohrer, F., Shao, M., Wang, B., Wang, M., Wu, Y., Zeng, L., Zhang, Y., Wahner, A., and Zhang, Y.: Radical chemistry at a rural site (Wangdu) in the North China Plain: observation and model calculations of OH, HO<sub>2</sub> and RO<sub>2</sub> radicals, *Atmos. Chem. Phys.*, 17, 663-690, 10.5194/acp-17-663-2017, 2017.

Tian, R., Ma, X., Jia, H., Yu, F., Sha, T., and Zan, Y.: Aerosol radiative effects on tropospheric photochemistry with GEOS-Chem simulations, *Atmospheric Environment*, 208, 82-94, 2019.

Verstraeten, W. W., Neu, J. L., Williams, J. E., Bowman, K. W., Worden, J. R., and Boersma, K. F.: Rapid increases in tropospheric ozone production and export from China, *Nature geoscience*, 8, 690, 2015.

Wang, B., Shao, M., Lu, S. H., Yuan, B., Zhao, Y., Wang, M., Zhang, S. Q., and Wu, D.: Variation of ambient non-methane hydrocarbons in Beijing city in summer 2008, *Atmospheric Chemistry and Physics*, 10, 5911-5923, 10.5194/acp-10-5911-2010, 2010.

Wang, H., Lu, K., Tan, Z., Sun, K., Li, X., Hu, M., Shao, M., Zeng, L., Zhu, T., and Zhang, Y.: Model simulation of NO<sub>3</sub>, N<sub>2</sub>O<sub>5</sub> and ClNO<sub>2</sub> at a rural site in Beijing during CAREBeijing-2006, *Atmospheric Research*, 196, 97-107, 2017.

Wang, J., Allen, D. J., Pickering, K. E., Li, Z., and He, H.: Impact of aerosol direct effect on East Asian air quality during the EAST-AIRE campaign, *Journal of Geophysical Research: Atmospheres*, 121, 6534-6554, 2016a.

Wang, J. L., Din, G. Z., and Chan, C. C.: Validation of a laboratory-constructed automated gas chromatograph for the measurement of ozone precursors through comparison with a commercial analogy, *Journal of Chromatography A*, 1027, 11-18, 10.1016/j.chroma.2003.08.099, 2004.

Wang, M., Zeng, L., Lu, S., Shao, M., Liu, X., Yu, X., Chen, W., Yuan, B., Zhang, Q., Hu, M., and Zhang, Z.: Development and validation of a cryogen-free automatic gas chromatograph system (GC-MS/FID) for online measurements of volatile organic compounds, *Analytical Methods*, 6, 9424-9434, 10.1039/c4ay01855a, 2014.

Wang, M., Shao, M., Chen, W., Lu, S., Liu, Y., Yuan, B., Zhang, Q., Zhang, Q., Chang, C. C., Wang, B., Zeng, L., Hu, M., Yang, Y., and Li, Y.: Trends of non-methane hydrocarbons (NMHC) emissions in Beijing during 2002-2013, *Atmospheric Chemistry and Physics*, 15, 1489-1502, 10.5194/acp-15-1489-2015, 2015a.

Wang, Q. Q., Sun, Y. L., Jiang, Q., Du, W., Sun, C. Z., Fu, P. Q., and Wang, Z. F.: Chemical composition

891 of aerosol particles and light extinction apportionment before and during the heating season in  
892 Beijing, China, *Journal of Geophysical Research-Atmospheres*, 120, 12708-12722,  
893 10.1002/2015jd023871, 2015b.

894 Wang, W., Li, X., Shao, M., Hu, M., Zeng, L., Wu, Y., and Tan, T.: The impact of aerosols on photolysis  
895 frequencies and ozone production in Beijing during the 4-year period 2012–2015, *Atmos. Chem.*  
896 *Phys.*, 19, 9413–9429, 10.5194/acp-19-9413-2019, 2019.

897 Wang, X. M., Chen, W. H., Chen, D. H., Wu, Z. Y., and Fan, Q.: Long-term trends of fine particulate  
898 matter and chemical composition in the Pearl River Delta Economic Zone (PRDEZ), China, *Front.*  
899 *Env. Sci. Eng.*, 10, 53–62, 10.1007/s11783-014-0728-z, 2016b.

900 Wang, Y., Zhang, Y., Hao, J., and Luo, M.: Seasonal and spatial variability of surface ozone over  
901 China: contributions from background and domestic pollution, *Atmospheric Chemistry and Physics*,  
902 11, 3511–3525, 10.5194/acp-11-3511-2011, 2011.

903 Warneke, C., de Gouw, J. A., Holloway, J. S., Peischl, J., Ryerson, T. B., Atlas, E., Blake, D., Trainer, M.,  
904 and Parrish, D. D.: Multiyear trends in volatile organic compounds in Los Angeles, California: Five  
905 decades of decreasing emissions, *Journal of Geophysical Research-Atmospheres*, 117,  
906 10.1029/2012jd017899, 2012.

907 Wehner, B., Birmili, W., Ditas, F., Wu, Z., Hu, M., Liu, X., Mao, J., Sugimoto, N., and Wiedensohler,  
908 A.: Relationships between submicrometer particulate air pollution and air mass history in Beijing,  
909 China, 2004–2006, *Atmospheric Chemistry and Physics*, 8, 6155–6168, 10.5194/acp-8-6155-2008,  
910 2008.

911 Wendisch, M., Mertes, S., Ruggaber, A., and Nakajima, T.: Vertical profiles of aerosol and radiation  
912 and the influence of a temperature inversion: Measurements and radiative transfer calculations, *J.*  
913 *Appl. Meteorol.*, 35, 1703–1715, 10.1175/1520-0450(1996)035<1703:vpoaar>2.0.co;2, 1996.

914 Xie, X., Shao, M., Liu, Y., Lu, S., Chang, C.-C., and Chen, Z.-M.: Estimate of initial isoprene  
915 contribution to ozone formation potential in Beijing, China, *Atmospheric Environment*, 42, 6000–  
916 6010, 10.1016/j.atmosenv.2008.03.035, 2008.

917 Xu, J., Ma, J. Z., Zhang, X. L., Xu, X. B., Xu, X. F., Lin, W. L., Wang, Y., Meng, W., and Ma, Z. Q.:  
918 Measurements of ozone and its precursors in Beijing during summertime: impact of urban plumes  
919 on ozone pollution in downwind rural areas, *Atmospheric Chemistry and Physics*, 11, 12241–12252,  
920 10.5194/acp-11-12241-2011, 2011.

921 Xu, J., Zhang, Y. H., Zheng, S. Q., and He, Y. J.: Aerosol effects on ozone concentrations in Beijing:  
922 A model sensitivity study, *J. Environ. Sci.*, 24, 645–656, 10.1016/s1001-0742(11)60811-5, 2012.

923 Yuan, B., Shao, M., de Gouw, J., Parrish, D. D., Lu, S., Wang, M., Zeng, L., Zhang, Q., Song, Y., Zhang,  
924 J., and Hu, M.: Volatile organic compounds (VOCs) in urban air: How chemistry affects the  
925 interpretation of positive matrix factorization (PMF) analysis, *Journal of Geophysical Research-*  
926 *Atmospheres*, 117, 10.1029/2012jd018236, 2012.

927 Zhang, J. P., Zhu, T., Zhang, Q. H., Li, C. C., Shu, H. L., Ying, Y., Dai, Z. P., Wang, X., Liu, X. Y., Liang,  
928 A. M., Shen, H. X., and Yi, B. Q.: The impact of circulation patterns on regional transport pathways  
929 and air quality over Beijing and its surroundings, *Atmospheric Chemistry and Physics*, 12, 5031–  
930 5053, 10.5194/acp-12-5031-2012, 2012.

931 Zhang, L., Shao, J. Y., Lu, X., Zhao, Y. H., Hu, Y. Y., Henze, D. K., Liao, H., Gong, S. L., and Zhang, Q.:  
932 Sources and Processes Affecting Fine Particulate Matter Pollution over North China: An Adjoint  
933 Analysis of the Beijing APEC Period, *Environ. Sci. Technol.*, 50, 8731–8740, 10.1021/acs.est.6b03010,  
934 2016.

935 Zhang, Q., Yuan, B., Shao, M., Wang, X., Lu, S., Lu, K., Wang, M., Chen, L., Chang, C. C., and Liu, S.  
 936 C.: Variations of ground-level O<sub>3</sub> and its precursors in Beijing in summertime between 2005 and  
 937 2011, *Atmospheric Chemistry and Physics*, 14, 6089-6101, 10.5194/acp-14-6089-2014, 2014.  
 938 Zhao, B., Wang, S. X., Liu, H., Xu, J. Y., Fu, K., Klimont, Z., Hao, J. M., He, K. B., Cofala, J., and Amann,  
 939 M.: NO<sub>x</sub> emissions in China: historical trends and future perspectives, *Atmospheric Chemistry and*  
 940 *Physics*, 13, 9869-9897, 10.5194/acp-13-9869-2013, 2013.  
 941 Zhao, P. S., Zhang, X. L., and Xu, X. F.: Long-term visibility trends and characteristics in the region  
 942 of Beijing, Tianjin, and Hebei, China, *Abstr. Pap. Am. Chem. Soc.*, 242, 1, 2011.  
 943 Zheng, C., Zhao, C., Zhu, Y., Wang, Y., Shi, X., Wu, X., Chen, T., Wu, F., and Qiu, Y.: Analysis of  
 944 influential factors for the relationship between PM<sub>2.5</sub> and AOD in Beijing, *Atmospheric*  
 945 *Chemistry and Physics*, 17, 13473-13489, 2017.  
 946 Zou, Q., Song, H., Tang, M., and Lu, K.: Measurements of HO<sub>2</sub> uptake coefficient on aqueous  
 947 (NH<sub>4</sub>)<sub>2</sub>SO<sub>4</sub> aerosol using aerosol flow tube with LIF system, *Chin. Chem. Lett.*, 30, 2236-2240,  
 948 <https://doi.org/10.1016/j.cclet.2019.07.041>, 2019.

949

950

951

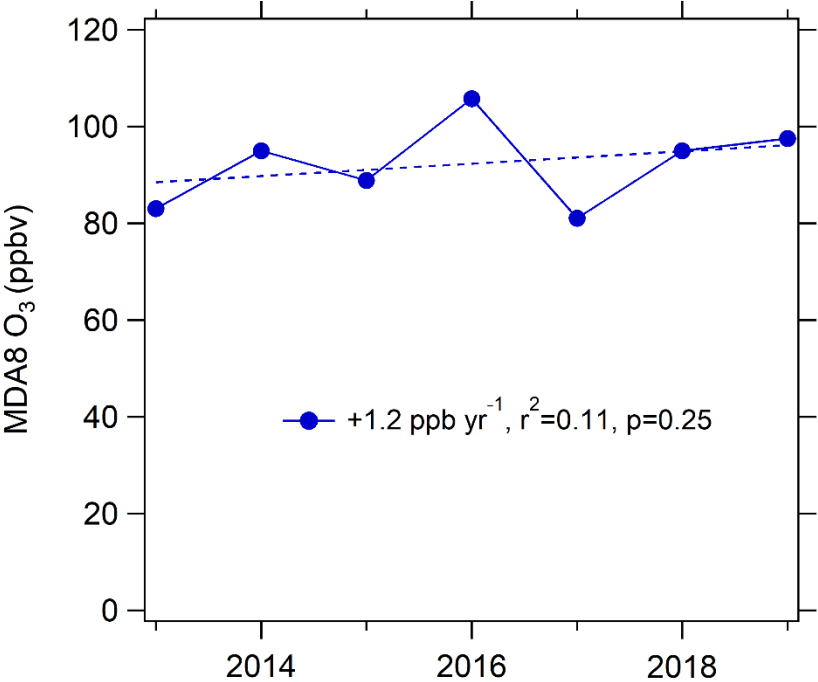

Figure S1. The trend of average MDA8 ozone in Changdao during 2013-2019. These data are acquired from “Blue book on prevention and control of atmospheric ozone pollution in China (in Chinese)” reported by Chinese Society of Environmental Sciences in 2020 ([http://www.epserve.com/forepart/zxnr\\_index.do?oid=51478637&tid=26378242](http://www.epserve.com/forepart/zxnr_index.do?oid=51478637&tid=26378242)).

979

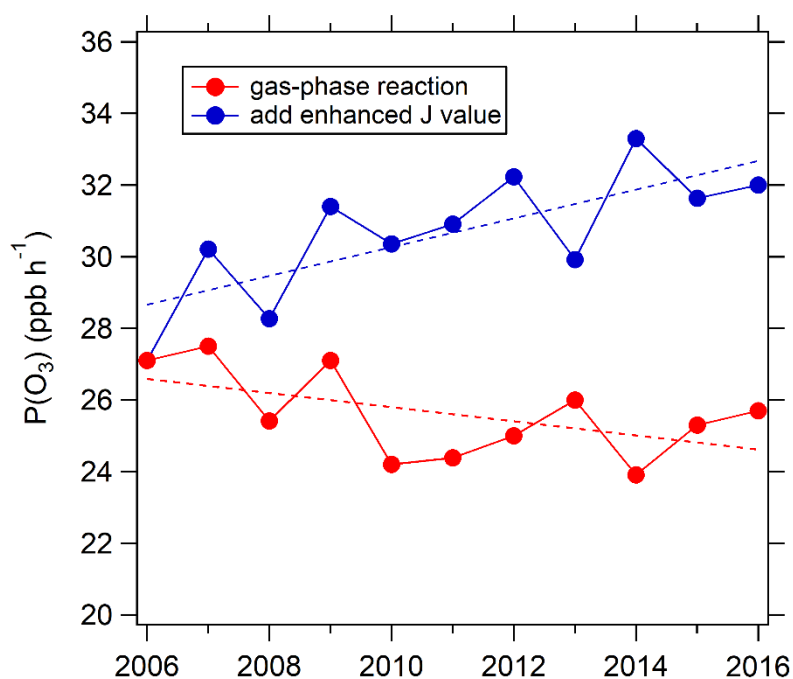

980

981 Figure S2. Trend of monthly afternoon (12:00-15:00) mean  $P(O_3)$  simulated by the  
 982 chemical box model. Red dots: Only the gas-phase reactions are considered in the box  
 983 model constrained by observed photolysis frequencies from 2006 for all eleven years.  
 984 Blue dots: the box model as above, but constrained by the photolysis frequencies  
 985 derived for each year without the changing aerosol uptake of  $HO_2$  considered.

986

987

988

989

990

991

992

993

994

995

996

997

998

999

1000

1001

1002

1003

1004

1005

1006

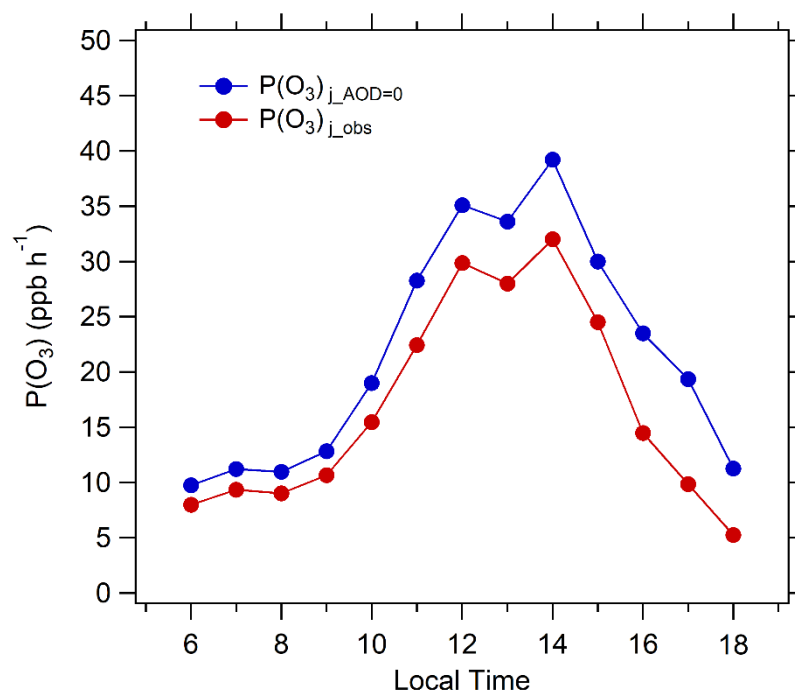

1007

1008 Figure S3. Diurnal variation of simulated  $P(O_3)$  in Beijing in August during 2005-

1009 2016.  $P(O_3)_{j\_obs}$  represents ozone production rate under observed photolysis

1010 frequencies;  $P(O_3)_{j\_AOD=0}$  represents ozone production rate under calculated

1011 photolysis frequencies when AOD is equal to 0.

1012
